# Supplementary material for: Art therapies and cognitive function in elderly with subjective cognitive decline: a protocol for a network meta-analysis
Source: PubMed Central journal article supplement — BMJ Open. 2024 Apr 19;14(4):e079146. doi: 10.1136/bmjopen-2023-079146 (PMC11033635; doi:10.1136/bmjopen-2023-079146), 2024-04-19
Supplement: bmjopen-2023-079146.draft_revisions.pdf [file bmjopen-2023-079146.draft_revisions.pdf]

# BMJ Open

BMJ Open is committed to open peer review. As part of this commitment we make the peer review history of every article we publish publicly available.

When an article is published we post the peer reviewers' comments and the authors' responses online. We also post the versions of the paper that were used during peer review. These are the versions that the peer review comments apply to.

The versions of the paper that follow are the versions that were submitted during the peer review process. They are not the versions of record or the final published versions. They should not be cited or distributed as the published version of this manuscript.

BMJ Open is an open access journal and the full, final, typeset and author-corrected version of record of the manuscript is available on our site with no access controls, subscription charges or pay-per-view fees (<http://bmjopen.bmj.com>).

If you have any questions on BMJ Open's open peer review process please email [info.bmjopen@bmj.com](mailto:info.bmjopen@bmj.com)

# BMJ Open

## Art therapies improve cognitive function in elderly with subjective cognitive decline: a protocol for a network meta-analysis

|                               |                                                                                                                                                                                                                                                                                                                                                                               |
|-------------------------------|-------------------------------------------------------------------------------------------------------------------------------------------------------------------------------------------------------------------------------------------------------------------------------------------------------------------------------------------------------------------------------|
| Journal:                      | <i>BMJ Open</i>                                                                                                                                                                                                                                                                                                                                                               |
| Manuscript ID                 | bmjopen-2023-079146                                                                                                                                                                                                                                                                                                                                                           |
| Article Type:                 | Protocol                                                                                                                                                                                                                                                                                                                                                                      |
| Date Submitted by the Author: | 24-Aug-2023                                                                                                                                                                                                                                                                                                                                                                   |
| Complete List of Authors:     | Liu, Qian; Sichuan University West China Hospital<br>Wang, Fang; Sichuan University West China Hospital, West China School of Nursing/Innovation Center of Nursing Research, Nursing Key Laboratory of Sichuan Province, National Clinical Research Center for Geriatrics<br>Tan, Lixia; Sichuan University<br>Liu, Li; Sichuan University<br>Hu, Xiuying; Sichuan University |
| Keywords:                     | Delirium & cognitive disorders < PSYCHIATRY, Nursing Care, Systematic Review, Protocols & guidelines < HEALTH SERVICES ADMINISTRATION & MANAGEMENT                                                                                                                                                                                                                            |
|                               |                                                                                                                                                                                                                                                                                                                                                                               |

SCHOLARONE™  
Manuscripts

**Title page****Title**

Art therapies improve cognitive function in elderly with subjective cognitive decline:  
a protocol for a network meta-analysis

**List of all authors**

Qian Liu<sup>1,#</sup>, Fang Wang<sup>1,#</sup>, Lixia Tan<sup>1</sup>, Li Liu<sup>1</sup>, Xiuying Hu<sup>1,\*</sup>

<sup>1</sup> Innovation Center of Nursing Research, Nursing Key Laboratory of Sichuan Province, West China Hospital, Sichuan University/West China School of Nursing, Sichuan University, China.

# These authors contributed equally to this work

\* Corresponding author: Xiuying Hu. Innovation Center of Nursing Research, Nursing Key Laboratory of Sichuan Province, West China Hospital, Sichuan University/West China School of Nursing, Sichuan University, PO Box No.37 Guo Xue Street, Chengdu, Sichuan 610041, PR China. Electronic address: [huxiuying@scu.edu.cn](mailto:huxiuying@scu.edu.cn).

**Authors' contributions**

Qian Liu designed this study with oversight by Xiuying Hu. Qian Liu drafted the protocol, and the draft was modified by Fang Wang and Li Liu. Qian Liu and Lixia Tan will search, select, and identify studies included, and extract data independently, while Li Liu will be the third reviewer for study selection and data extraction. Qian Liu will be responsible for methodology. All authors have approved the publication of this protocol.

## **Funding Statement**

This study is funded by the project from the West China Hospital of Sichuan University and University of Electronic Science and Technology of China (Grant No. HXDZ21003) and Institutional Research Fund from Sichuan University (2022SCUH0030).

## **Conflict of Interest**

The authors have no conflicts of interest to disclose.

1  
2  
3  
4 1 Art therapies improve cognitive function in elderly with subjective  
5  
6 2 cognitive decline: a protocol for a network meta-analysis  
7  
8  
9 3

10  
11  
12 4 **Abstract**  
13

14 5 Introduction: The number of elderly with subjective cognitive decline has increased  
15  
16 6 in recent years. Subjective cognitive decline is likely to evolve into Alzheimer's disease,  
17  
18 7 which may bring huge burdens and challenges to caregivers and society. With the  
19  
20 8 increase in research, some art therapies have gradually been proven to be effective for  
21  
22 9 cognitive function. Therefore, this study aims to summarize the evidence and identify  
23  
24 10 the most effective art therapy for elderly with subjective cognitive decline.  
25  
26  
27  
28  
29

30 11 Methods and analysis: We will include published randomized controlled trials if the  
31  
32 12 intervention is one of the art therapies and applied in elderly with subjective cognitive  
33  
34 13 decline. Eight electronic databases, including the Cochrane Central Register of  
35  
36 14 Controlled Trials, PubMed, Web of Science, Elsevier, China BioMedical Literature  
37  
38 15 Database, China National Knowledge Infrastructure, VIP Database, and Wanfang  
39  
40 16 Database, will be searched from January 2013 to present. Art therapies will mainly  
41  
42 17 include music therapy, painting therapy, dance therapy, horticultural therapy,  
43  
44 18 calligraphy therapy, and reminiscence therapy. The outcome will be cognitive function.  
45  
46 19 Study selection, data extraction and quality assessment will be performed  
47  
48 20 independently by two reviewers. The risk of bias of the included studies will be  
49  
50 21 evaluated according to the Cochrane Collaboration's risk of bias tool, and the evidence  
51  
52 22 quality will be assessed with the Grading of Recommendations Assessment,  
53  
54  
55  
56  
57  
58  
59  
60

1 Development and Evaluation. To compare the efficacy of different art therapies,  
2 standard pairwise meta-analysis and Bayesian network meta-analysis will be conducted  
3 for all outcomes. The probabilities of each art therapy for outcomes will be ranked in  
4 accordance with the surface under the cumulative ranking curve.

5 Ethics and dissemination: Ethical approval is not required for reviewing published  
6 studies. To provide important evidence for clinicians and guideline developers to  
7 determine interventions for patients with subjective cognitive decline, the findings of  
8 this study will be submitted to a peer-reviewed journal.

9 PROSPERO registration number: CRD42023443773.

10 Key words: subjective cognitive decline; elderly; art therapy; protocol; network  
11 meta-analysis

### 12 **Strengths and limitations of this study**

13  
14 1. This network meta-analysis will integrate direct evidence with indirect evidence  
15 and allow the comparison of multiple art therapies in one model.

16 2. For the first time the cognitive function outcome of art therapies in combination  
17 with usual care for elderly with subjective cognitive decline will be comprehensively  
18 assessed in a network meta-analysis.

19 3. Network meta-analysis will promote precision of intervention and provide  
20 evidence for the decisions of intervention and the development of guidelines.

21 4. On account of the retrospective nature of this study, the findings may be influenced  
22 by the quantity and quality of the included studies.

23

## 1 Introduction

2 As a global public health problem that urgently needs to be addressed, Alzheimer's  
3 disease leads to the loss of reasoning, memory, language, and ultimately basic self-care  
4 skills, which places an enormous burden on families and the health-care system. The  
5 development of Alzheimer's disease is insidious, with onset of clinical symptoms  
6 preceded years earlier by perceived and/or objective cognitive decline,<sup>1</sup> which is also  
7 the early stage of mild cognitive impairment.<sup>2</sup> Subjective cognitive decline refers to the  
8 decline in the subjective perception of self-cognitive function compared with the  
9 previous normal state, mainly memory decline, but objective neuropsychological tests  
10 are not abnormal, and this decline is not related to other acute events.<sup>3</sup> Previous studies  
11 have suggested that subjective cognitive decline is a preclinical symptom of  
12 Alzheimer's disease.<sup>4-6</sup> A systematic review that included 46 longitudinal studies  
13 showed that the risk of developing dementia in the elderly with subjective cognitive  
14 decline was 2.48 times higher than that in the elderly without cognitive abnormalities,  
15 and the risk of developing mild cognitive impairment was 1.83 times higher than that  
16 in the elderly without cognitive abnormalities.<sup>7</sup> Moreover, the findings of a long-term  
17 observational study over 10 years indicate that subjective cognitive decline can occur  
18 10 years before the diagnosis of Alzheimer's disease.<sup>8</sup> Therefore, the therapeutic  
19 window for addressing Alzheimer's disease can be moved forward, and subjective  
20 cognitive decline can be regarded as an important gateway for early prevention and  
21 treatment of Alzheimer's disease, which may help alleviate the major public health  
22 problem, although there are no approved treatments for Alzheimer's disease and even

1 mild cognitive impairment.<sup>9</sup>

2       The efficacy of pharmacological interventions is limited. To avoid the side effects  
3 of antipsychotics, more attention is given to the application of nonpharmacological  
4 interventions.<sup>10</sup> Art therapy is an emerging nonpharmacological intervention with  
5 distinctive features that integrates psychology, art and medicine. Art therapy can take a  
6 variety of forms, such as music, singing, dancing, reading and poetry groups,  
7 museum/gallery art and collections, creative writing, life story narrative reminiscence,  
8 painting, printmaking, collage, pottery, sewing, knitting, woodwork and gardening.<sup>11</sup>  
9 As a kind of nonpharmacological intervention, art therapy has been widely proven to  
10 be beneficial in the care of patients with cognitive impairment and has been used in  
11 clinical practice in Europe and the United States.<sup>12</sup> It is helpful to reduce the mental and  
12 behavioral abnormalities of patients and slow down the progress of cognitive  
13 impairment, to achieve great effects in treatment and care. It is suggested that music  
14 listening can help to improve both subjective memory function and objective cognitive  
15 performance in adults with subjective cognitive decline.<sup>13</sup> Several randomized  
16 controlled trials have demonstrated that dance therapy can improve cognitive function,  
17 especially episodic memory and processing speed.<sup>14-16</sup> Moreover, painting therapy has  
18 been proven to improve cognitive function in patients with mild cognitive  
19 impairment.<sup>17</sup> A narrow review has summarized the positive effects of therapeutic  
20 gardens on the health, spanning physical, social, psychological and cognitive effects.<sup>18</sup>  
21 Additionally, spiritual reminiscence programs using expressive arts therapy are  
22 conducive to improving cognitive function.<sup>19</sup>



1 With the increase in relevant research, art therapy has gradually been proven to be of  
2 great significance in alleviating cognitive decline. However, the advantages and  
3 disadvantages of the effects of different art therapies on elderly with subjective  
4 cognitive decline are still inconclusive at present, and studies directly comparing the  
5 differences in various art therapies are lacking. Network meta-analysis is capable of  
6 summarizing direct and indirect evidence, thus evaluating and comparing the relative  
7 efficacy of multiple treatments.<sup>20</sup> More importantly, network meta-analysis can provide  
8 the ranking of intervention options in accordance with their effectiveness. Therefore, to  
9 provide important evidence for care decision-making for elderly with subjective  
10 cognitive decline, this study will evaluate the effects of different art therapies through  
11 a network meta-analysis.

## 12 **Methods and analysis**

13 This network meta-analysis protocol was registered on the PROSPERO platform  
14 (CRD42023443773). The results of this network meta-analysis will be reported  
15 following the Preferred Reporting Items for Systematic Review and Meta-Analysis  
16 Protocols.<sup>21</sup>

### 17 **Eligibility criteria**

#### 18 Type of participants

19 Elderly diagnosed with subjective cognitive decline will be included, according to  
20 the criteria published by the Subjective Cognitive Decline Initiative.<sup>22 23</sup> Inclusion  
21 criteria are (1) there is a continuous decline in cognitive function of self perception  
22 compared to the previous state of accessibility, and it is not related to acute events; (2)

1 the standard cognitive test shows no abnormalities after adjustment for age, gender, and  
2 years of education, and do not meet the diagnostic criteria for mild cognitive  
3 impairment; (3) complaints of continuous memory decline in the past 5 years; (4) 60  
4 years or older; (5) subjective memory decline (not in other cognitive domains), and  
5 concerns about the cognitive decline. The exclusion criteria are (1) diagnosed with  
6 various types of dementia; (2) a clear history of cerebrovascular disease or recent brain  
7 trauma; (3) nervous system diseases that may affect the cognitive function, such as  
8 brain tumors, Parkinson's disease, encephalitis, epilepsy, delirium and carbon  
9 monoxide poisoning; (4) other major diseases that may affect subjective cognitive  
10 function, such as severe metabolic diseases and severe cardiopulmonary diseases; and  
11 (6) severe mental illnesses, such as schizophrenia, bipolar disorder, severe depression,  
12 and severe anxiety.

### 13 Type of studies

14 Only randomized controlled trials written in English or Chinese will be included.  
15 Cluster randomized controlled trials and cross-over randomized controlled trials will  
16 be excluded. Trials without a control group will be excluded. If the control group did  
17 not receive art therapy or usual care, the trial will also be excluded.

### 18 Type of intervention

19 Any art therapy that is combined with usual care and implemented in elderly with  
20 subjective cognitive decline will be included. However, multi-component interventions  
21 will be excluded. These art therapies may be aimed at improving cognitive function.

22 The types of art therapies for elderly with subjective cognitive decline may include (1)

1 music therapy, (2) dance therapy,<sup>Error! Reference source not found.</sup> (3) reading therapy,<sup>Error!</sup>  
2 <sup>Error! Reference source not found.</sup> (4) painting therapy,<sup>Error! Reference source not found.</sup> (5) horticultural  
3 therapy,<sup>Error! Reference source not found.</sup> (6) reminiscence therapy<sup>Error! Reference source not found.</sup> and  
4 (7) calligraphy therapy.<sup>Error! Reference source not found.</sup>

## 5 Comparison

6 Comparator will be considered a usual care of subjective cognitive decline (such as  
7 guidance of drugs, diet, rehabilitation and complication prevention) or another art  
8 therapy combined with usual care.

## 9 Type of outcomes

10 The outcome will focus on cognitive function, which might be measured by a  
11 validated cognitive outcome measure, for example, subjective cognitive decline  
12 Questionnaire, the Mini-Mental State Examination, Montreal Cognitive Assessment,  
13 Addenbrooke's Cognitive Examination-III, Mini-Addenbrooke's Cognitive  
14 Examination, Memory Impairment Screen, Quick Screen for Mild Cognitive  
15 Impairment, Clock-Drawing Test, or Repeatable Battery for the Assessment of  
16 Neuropsychological Status.

## 17 **Data sources and search strategy**

18 The search used a combination of Medical Subject Headings and free words for  
19 professional searches. The search items will include subjective cognitive decline or  
20 SCD, art therapy (music\* or singing or danc\* or painting or drawing or collage or clay  
21 or theatre or drama or reading or poetry or woodwork or garden\* or horticultural or  
22 handwriting or penmanship or calligraphy or ceramics or pottery or writing or sculpture

1 or carving or narrative or reminiscence or printmaking or sewing or knitting or museum  
2 or gallery) and randomized controlled trial. Searches will be undertaken in electronic  
3 databases to identify published studies, including the Cochrane Central Register of  
4 Controlled Trials, PubMed, Web of Science, Elsevier, China BioMedical Literature  
5 Database, China National Knowledge Infrastructure, VIP Database, and Wanfang  
6 Database. A draft search strategy is summarized in Supplementary Material 1. The  
7 retrieval time will be from January 2013 to the present. In addition to the database  
8 search, the references of the included studies will be scanned to identify additional  
9 eligible studies.

#### 10 **Study selection**

11 All investigators will receive appropriate training prior to study selection. All  
12 retrieved studies will be imported into NoteExpress software to download references.  
13 Duplicate studies will be removed. The titles and abstracts of selected studies will be  
14 screened independently by two reviewers to exclude studies that obviously do not meet  
15 the inclusion criteria. The preliminary results will be cross-checked. Then, the  
16 remaining full-text studies will be examined independently by the same two reviewers  
17 to determine eligibility. If there are disagreements, the third reviewer will be asked to  
18 evaluate the full text. Any discrepancies will be resolved through group discussions.  
19 We will record the excluded studies and reasons for exclusion. Figure 1 shows the  
20 process of study selection.

#### 21 **Data extraction**

22 All researchers of this study will discuss and design a standard form for data

1  
2  
3  
4 1 extraction. Then, two reviewers will independently extract data in accordance with the  
5  
6 2 standard form, including author (s), year of publication, sample size, characteristics of  
7  
8 3 patients (gender and age), intervention (type, frequency and duration), and  
9  
10 4 measurements of outcome. After completing data extraction, the results of two  
11  
12 5 reviewers will be crosschecked to ensure that there is no mistake. Team discussion will  
13  
14 6 be used to resolve the disagreements.

### 7 **Risk of bias assessment**

8 The revised version of the Cochrane tool (RoB 2) will be used to assess the risk of  
9 bias for all included studies.<sup>24</sup> This tool will assess five domains, including (1) bias  
10 arising from the randomization process, (2) bias due to deviations from intended  
11 interventions, (3) bias due to missing outcome data, (4) bias in the measurement of the  
12 outcome and (5) bias in the selection of the reported result. The assessment of each  
13 domain will be rated as 'low risk of bias', 'some concerns' and 'high risk of bias'. The  
14 response options for an overall risk-of-bias judgment are the same as those for  
15 individual domains. If all domains are rated as 'low risk of bias', this trial will be judged  
16 to be at low risk of bias. If at least one domain is rated as 'some concerns' and no  
17 domain is rated as 'high risk of bias', this trial will be judged to be 'some concerns'. If  
18 at least one domain is rated as 'high risk of bias' or multiple domains are rated as 'some  
19 concerns' in a way that substantially lowers confidence in the result, this trial will be  
20 judged to be at high risk of bias. Two reviewers will independently evaluate the risk of  
21 bias for each study and then cross-check the results. Differences will be resolved  
22 through team discussion with the third reviewer.

## 1 **Statistical analysis**

### 2 Pairwise meta-analysis

3 We will use Review Manager (version 5.3) to conduct a pairwise meta-analysis of  
4 direct evidence. For continuous outcomes, standardized mean differences with 95%  
5 confidence intervals will be used. The  $\chi^2$  test will be used to assess the heterogeneity  
6 across all included trials. A fixed-effects model will be used to synthesize the  
7 standardized mean difference if the p value is  $\geq 0.1$ . Conversely, if the p value is  $< 0.1$ ,  
8 a random-effects model will be used.

### 9 Network meta-analysis

10 Considering the expected heterogeneity between studies, the effects of different art  
11 therapies will be compared by conducting a random-effects network meta-analysis  
12 within a Bayesian framework using Markov Chains Monte Carlo in R software (version  
13 4.1.3). Brooks-Gelman-Rubin diagnosis and potential scale reduction factor will be  
14 used to ensure the convergence of the model.<sup>25</sup> Moreover, the surface under the  
15 cumulative ranking curve with its 95% confidence interval and rank-heat plot will be  
16 used to evaluate the hierarchy of each art therapy.<sup>26 27</sup>

### 17 Dealing with missing data

18 If there is a lack of some information, the missing data will be obtained by contacting  
19 the corresponding authors whenever possible. We will try to calculate the missing data  
20 based on availability factors if there is no reply. Sensitivity analysis will be used to  
21 examine the potential impact of missing data on the results of this study.

### 22 Assessment of publication bias

1  
2  
3  
4 1 If more than nine studies are included in the analysis, funnel plots, Begg's rank  
5  
6 2 correction and Egger's regression tests will be used to evaluate the presence of  
7  
8  
9 3 publication bias in Stata software (version 15.0).<sup>28-30</sup>

#### 4 Assessment of inconsistency and subgroup analysis

5 Based on a loop-special method within each loop of the network,<sup>31</sup> the local  
6 inconsistency and global inconsistency will be measured in Stata software (version  
7 15.0).<sup>[32]32</sup> If there is heterogeneity or inconsistency, the sources of heterogeneity will  
8 be explored by network meta-regression. Subgroup analysis will be performed in  
9 accordance with age, gender, or duration of intervention.

#### 10 Sensitivity analysis

11 We will perform a sensitivity analysis for primary outcomes to verify the robustness  
12 of the findings. In the sensitivity analysis, trials judged to be at high risk of bias, trials  
13 with missing data and trials with the smallest sample size will be excluded. Then, to  
14 examine whether the results change and whether the transitivity (consistency and model  
15 fit) is affected, the same methods used to conduct the network meta-analysis will be  
16 repeated.

#### 17 Quality of evidence

18 We will also evaluate the quality of evidence conducting to primary outcomes based  
19 on the Grading of Recommendations Assessment, Development and Evaluation  
20 framework, in accordance with limitations of study, imprecision, heterogeneity,  
21 inconsistency, indirectness and publication bias.<sup>33</sup>

#### 22 Patient and public involvement

## 1 Discussion

2 According to a cohort study, the prevalence of subjective cognitive decline is  
3 currently slightly high, ranging from 7.8% to 52.7% which is based on estimated based  
4 on age and gender standardization in the population.<sup>34</sup> This means that subjective  
5 cognitive decline is gradually becoming a health issue in elderly who requires special  
6 attention. Subjective cognitive decline is an important risk factor for mild cognitive  
7 impairment and Alzheimer's disease,<sup>6</sup> which may cause adverse effects on the quality  
8 of life of elderly and bring enormous burdens to caregivers and society, and obstruct  
9 the realization of healthy aging and active aging. The effects of pharmacological  
10 intervention are limited to some extent. Nonpharmacological interventions have  
11 become the preferred approach to treat and care for patients with cognitive impairment  
12 because of their simplicity, easy operation and high safety.<sup>35</sup>

13 At present, art therapies including music therapy, dance therapy, painting therapy,  
14 reading therapy, horticultural therapy, reminiscence therapy, calligraphy therapy and  
15 museum therapy have been applied to improve cognitive function in patients with  
16 subjective cognitive decline. To date, no network meta-analysis has been performed to  
17 evaluate the comparative efficacy of all available art therapies. Consequently, it is  
18 necessary to conduct a network meta-analysis to identify the effects of art therapies. To  
19 the best of our knowledge, this is the first network meta-analysis to analyze the effects  
20 of art therapies in elderly with subjective cognitive decline. Based on the comparative  
21 effectiveness evidence, this network meta-analysis is expected to provide a ranking of  
22 these art therapies for improving cognitive function in elderly with subjective cognitive



1 decline. The results could help patients and clinicians choose the best intervention. In  
2 addition, we hope that the results of this study could provide evidence for the  
3 recommendations of guidelines.

#### 4 **Ethics and dissemination**

5 This study is based on published data, so ethical approval is not a requirement. We  
6 plan to publish the findings of this study in a peer-reviewed journal. This work is now  
7 in progress, and preparations has start on 28 June 2023. We are searching the relevant  
8 studies. The expected end time is 31 May 2024. The results will be reported based on  
9 the PRISMA-compliant guidelines.

#### 10 **Authors' contributions**

11 Qian Liu designed this study with oversight by Xiuying Hu. Qian Liu drafted the  
12 protocol, and the draft was modified by Fang Wang and Li Liu. Qian Liu and Lixia Tan  
13 will search, select, and identify studies, and extract data independently, while Li Liu  
14 will be the third reviewer for study selection and data extraction. Qian Liu will be  
15 responsible for the methodology. All authors have approved the publication of this  
16 protocol.

#### 17 **Funding statement**

18 This study is funded by a project from the West China Hospital of Sichuan University  
19 and University of Electronic Science and Technology of China (Grant No. HXDZ21003)  
20 and the Institutional Research Fund from Sichuan University (2022SCUH0030).

#### 21 **Competing interests statement**

22 The authors have no conflicts of interest to disclose.

## 1 Patient and Public Involvement

2 This study is based on published data, so patients or the public were not involved in  
3 the design, conduct, reporting, and dissemination plans of our research.

## 4 References

- 5 [1] Alzheimer's Association. 2015 Alzheimer's disease facts and figures. *Alzheimers Dement* 2015;11(3):332-84.
- 6 [2] Jack CR Jr, Bennett DA, Blennow K, *et al.* NIA-AA Research Framework: Toward  
7 a biological definition of Alzheimer's disease. *Alzheimers Dement* 2018; 14(4):535-562.
- 8 [3] Jessen F, Amariglio RE, van Boxtel M, *et al.* A conceptual framework for research  
9 on subjective cognitive decline in preclinical Alzheimer's disease. *Alzheimers Dement*  
10 2014;10(6):844-52.
- 11 [4] Lin Y, Shan PY, Jiang WJ, *et al.* Subjective cognitive decline: preclinical  
12 manifestation of Alzheimer's disease. *Neurol Sci* 2019;40(1):41-49.
- 13 [5] Slot RER, Sikkes SAM, Berkhof J, *et al.* Subjective cognitive decline and rates of  
14 incident Alzheimer's disease and non-Alzheimer's disease dementia. *Alzheimers*  
15 *Dement* 2019;15(3):465-476.
- 16 [6] Colijn MA, Grossberg GT. Amyloid and Tau Biomarkers in Subjective Cognitive  
17 Impairment. *J Alzheimers Dis* 2015;47(1):1-8.
- 18 [7] Pike KE, Cavuoto MG, Li L, *et al.* Subjective Cognitive Decline: Level of Risk for  
19 Future Dementia and Mild Cognitive Impairment, a Meta-Analysis of Longitudinal  
20 Studies. *Neuropsychol Rev* 2022;32(4):703-735.
- 21 [8] Verlinden VJA, van der Geest JN, de Bruijn RFAG, *et al.* Trajectories of decline in  
22 cognition and daily functioning in preclinical dementia. *Alzheimers Dement*  
23 2016;12(2):144-153.
- 24 [9] Sperling RA, Jack CR Jr, Aisen PS. Testing the right target and right drug at the  
25 right stage. *Sci Transl Med* 2011;3(111):111cm33.
- 26 [10] Abraha I, Rimland JM, Trotta FM, *et al.* Systematic review of systematic reviews  
27 of non-pharmacological interventions to treat behavioural disturbances in older patients  
28 with dementia. The SENATOR-OnTop series. *BMJ Open* 2017; 7 (3): e012759.
- 29 [11] Roe B. Arts for health initiatives: an emerging international agenda and evidence  
30 base for older populations. *J Adv Nurs* 2014; 70 (1): 1-3.
- 31 [12] Camic PM, Zeilig H, Crutch SJ. The arts and dementia: Emerging directions for  
32 theory, research and practice. *Dementia (London)* 2018; 17 (6): 641-644.
- 33 [13] Innes KE, Selfe TK, Khalsa DS, *et al.* Meditation and Music Improve Memory and  
34 Cognitive Function in Adults with Subjective Cognitive Decline: A Pilot Randomized  
35 Controlled Trial. *J Alzheimers Dis* 2017;56(3):899-916.
- 36 [14] Zhu Y, Wu H, Qi M, *et al.* Effects of a specially designed aerobic dance routine on  
37 mild cognitive impairment. *Clin Interv Aging* 2018; 13: 1691-1700.
- 38 [15] Doi T, Verghese J, Makizako H, *et al.* Effects of Cognitive Leisure Activity on  
39  
40

1  
2  
3  
4  
5  
6  
7  
8  
9  
10  
11  
12  
13  
14  
15  
16  
17  
18  
19  
20  
21  
22  
23  
24  
25  
26  
27  
28  
29  
30  
31  
32  
33  
34  
35  
36  
37  
38  
39  
40  
41  
42  
43  
44  
45  
46  
47  
48  
49  
50  
51  
52  
53  
54  
55  
56  
57  
58  
59  
60

- 1 Cognition in Mild Cognitive Impairment: Results of a Randomized Controlled Trial. *J Am Med Dir Assoc* 2017; 18 (8): 686-691.
- 2
- 3 [16]Borges EGDS, Vale RGS, Pernambuco CS, *et al.* Effects of dance on the postural  
4 balance, cognition and functional autonomy of older adults. *Rev Bras Enferm* 2018; 71  
5 (suppl 5): 2302-2309.
- 6 [17]Zhao J, Li H, Lin R, *et al.* Effects of creative expression therapy for older adults  
7 with mild cognitive impairment at risk of Alzheimer's disease: a randomized controlled  
8 clinical trial. *Clin Interv Aging* 2018; 13: 1313-1320.
- 9 [18]Uwajeh PC, Iyendo TO, Polay M. Therapeutic gardens as a design approach for  
10 optimising the healing environment of patients with Alzheimer's disease and other  
11 dementias: A narrative review. *Explore (NY)* 2019; 15 (5): 352-362.
- 12 [19]Ho YV. A pilot study of spiritual reminiscence programme using expressive arts  
13 therapy for the older adults with mild cognitive impairment staying in nursing home.  
14 *Hong Kong: The University of Hong Kong*, 2017.
- 15 [20]Li J, Zhong D, Ye J, *et al.* Rehabilitation for balance impairment in patients after  
16 stroke: a protocol of a systematic review and network meta-analysis. *BMJ Open* 2019;  
17 9 (7): e026844.
- 18 [21]Shamseer L, Moher D, Clarke M, *et al.* Preferred reporting items for systematic  
19 review and meta-analysis protocols (PRISMA-P) 2015: elaboration and explanation.  
20 *BMJ* 2015; 350: g7647.
- 21 [22]Molinuevo JL, Rabin LA, Amariglio R, *et al.* Implementation of subjective  
22 cognitive decline criteria in research studies. *Alzheimers Dement* 2017;13(3):296-311.
- 23 [23]Song YH, Liu YS, Yang Q, *et al.* Correlation of Subjective Cognitive Decline with  
24 Multimorbidity among Elderly People. *Chinese General Practice* 2023; 26(10):1241-  
25 1249. (in Chinese)
- 26 [24]Sterne JAC, Savović J, Page MJ, *et al.* RoB 2: a revised tool for assessing risk of  
27 bias in randomised trials. *BMJ* 2019, 366:14898.
- 28 [25]Brooks SP, Gelman A. Alternative methods for monitoring convergence of  
29 iterative simulations. *J Comput Graph Stat* 1998; 7: 434-45.
- 30 [26]Salanti G, Ades AE, Ioannidis JP. Graphical methods and numerical summaries for  
31 presenting results from multiple-treatment meta-analysis: an overview and tutorial. *J*  
32 *Clin Epidemiol* 2011; 64 (2): 163-71.
- 33 [27]Veroniki AA, Straus SE, Fyraridis A, *et al.* The rank-heat plot is a novel way to  
34 present the results from a network meta-analysis including multiple outcomes. *J Clin*  
35 *Epidemiol* 2016; 76: 193-9.
- 36 [28]Collaboration TC. Cochrane Handbook for systematic reviews of interventions  
37 version 5.1.0, 2011.
- 38 [29]Begg CB, Mazumdar M. Operating characteristics of a RANK correlation test for  
39 publication bias. *Biometrics* 1994; 50: 1088-1101.
- 40 [30]Egger M, Smith GD, Schneider M, *et al.* Bias in meta-analysis detected by a simple,  
41 graphical test. *BMJ* 1997; 315: 629-34.
- 42 [31]Du Y, Wu F, Lu S, *et al.* Efficacy of pressure ulcer prevention interventions in  
43 adult intensive care units: a protocol for a systematic review and network meta-analysis.  
44 *BMJ Open* 2019; 9 (4): e026727.

1 [32]Higgins JP, Jackson D, Barrett JK, *et al.* Consistency and inconsistency in network  
2 meta-analysis: concepts and models for multi-arm studies. *Res Synth Methods* 2012; 3  
3 (2): 98-110.

4 [33]Puhan MA, Schünemann HJ, Murad MH, *et al.* A GRADE Working Group  
5 approach for rating the quality of treatment effect estimates from network meta-analysis.  
6 *BMJ* 2014; 349: g5630.

7 [34]Röhr S, Pabst A, Riedel-Heller SG, *et al.* Estimating prevalence of subjective  
8 cognitive decline in and across international cohort studies of aging: a COSMIC study.  
9 *Alzheimers Res Ther* 2020;12(1):167.

10 [35]Calsolaro V, Antognoli R, Okoye C, *et al.* The Use of Antipsychotic Drugs for  
11 Treating Behavioral Symptoms in Alzheimer's Disease. *Front Pharmacol* 2019; 10:  
12 1465.

13  
14  
15  
16  
17  
18  
19  
20  
21  
22  
23  
24  
25  
26  
27  
28  
29  
30  
31  
32  
33  
34  
35  
36  
37  
38  
39  
40  
41  
42  
43 **Figure legend**

1  
2  
3  
4  
5  
6  
7  
8  
9  
10  
11  
12  
13  
14  
15  
16  
17  
18  
19  
20  
21  
22  
23  
24  
25  
26  
27  
28  
29  
30  
31  
32  
33  
34  
35  
36  
37  
38  
39  
40  
41  
42  
43  
44  
45  
46  
47  
48  
49  
50  
51  
52  
53  
54  
55  
56  
57  
58  
59  
60

1 Figure 1. Study flow diagram

For peer review only

## Supplementary Material 1: Search strategy

### 1. Cochrane Central Register of Controlled Trials

(subjective cognitive decline OR SCD) AND (art therapy OR music\* OR singing OR danc\* OR painting OR drawing OR collage OR clay OR theatre OR drama OR reading OR poetry OR woodwork OR garden\* OR horticultural OR handwriting OR penmanship OR calligraphy OR ceramics OR pottery OR writing OR sculpture OR carving OR narrative OR reminiscence OR printmaking OR sewing OR knitting OR museum OR gallery) AND (randomized controlled trial OR RCT).

### 2. PubMed

("subjective cognitive decline" OR "SCD") AND ("art therapy" OR "music\*" OR "singing" OR "danc\*" OR "painting" OR "drawing" OR "collage" OR "clay" OR "theatre" OR "drama" OR "reading" OR "poetry" OR "woodwork" OR "garden\*" OR "horticultural" OR "handwriting" OR "penmanship" OR "calligraphy" OR "ceramics" OR "pottery" OR "writing" OR "sculpture" OR "carving" OR "narrative" OR "reminiscence" OR "printmaking" OR "sewing" OR "knitting" OR "museum" OR "gallery") AND ("randomized controlled trial" OR "RCT").

### 3. Web of Science

(TS =subjective cognitive decline OR TS =SCD) AND (TS =art therapy OR TS =music\* OR TS =singing OR TS =danc\* OR TS =painting OR TS =drawing OR TS =collage OR TS =clay OR TS =theatre OR TS =drama OR TS =reading OR TS =poetry OR TS =woodwork OR TS =garden\* OR TS =horticultural OR TS =handwriting OR TS =penmanship OR TS =calligraphy OR TS =ceramics OR TS =pottery OR TS =writing OR TS =sculpture OR TS =carving OR TS =narrative OR TS =reminiscence OR TS =printmaking OR TS =sewing OR TS =knitting OR TS =museum OR TS =gallery) AND (TS =randomized controlled trial OR TS =RCT).

### 4. Elsevier

(subjective cognitive decline OR SCD) AND (art therapy OR music\* OR singing OR danc\* OR painting OR drawing OR collage OR clay OR theatre OR drama OR reading OR poetry OR woodwork OR garden\* OR horticultural OR handwriting OR penmanship OR calligraphy OR ceramics OR pottery OR writing OR sculpture OR carving OR narrative OR reminiscence OR printmaking OR sewing OR knitting OR museum OR gallery) AND (randomized controlled trial OR RCT).

### **5. China BioMedical Literature Database**

(“主观认知能力下降” OR “主观认知下降”) AND (“音乐” OR “舞蹈” OR “绘画” OR “拼贴” OR “黏土” OR “戏剧” OR “诗歌” OR “阅读” OR “园艺” OR “书法” OR “陶艺” OR “写作” OR “雕塑” OR “叙事” OR “回忆” OR “缅怀” OR “版画” OR “缝纫” OR “针织” OR “博物馆” OR “画廊”) AND (“随机对照试验”)

### **6. China National Knowledge Infrastructure**

(SU=主观认知能力下降 OR SU=主观认知下降) AND (SU=音乐 OR SU=舞蹈 OR SU=绘画 OR SU=拼贴 OR SU=黏土 OR SU=戏剧 OR SU=诗歌 OR SU=阅读 OR SU=园艺 OR SU=书法 OR SU=陶艺 OR SU=写作 OR SU=雕塑 OR SU=叙事 OR SU=回忆 OR SU=缅怀 OR SU=版画 OR SU=缝纫 OR SU=针织 OR SU=博物馆 OR SU=画廊) AND (SU=随机对照试验)

### **7. VIP Database**

(“主观认知能力下降” OR “主观认知下降”) AND (“音乐” OR “舞蹈” OR “绘画” OR “拼贴” OR “黏土” OR “戏剧” OR “诗歌” OR “阅读” OR “园艺” OR “书法” OR “陶艺” OR “写作” OR “雕塑” OR “叙事” OR “回忆” OR “缅怀” OR “版画” OR “缝纫” OR “针织” OR “博物馆” OR “画廊”) AND (“随机对照试验”)

### **8. Wanfang Database**

(“主观认知能力下降” OR “主观认知下降”) AND (“音乐” OR “舞蹈” OR “绘画” OR “拼贴” OR “黏土” OR “戏剧” OR “诗歌” OR “阅读” OR “园艺” OR “书法”

1  
2  
3  
4 OR “陶艺 OR “写作” OR “雕塑” OR “叙事” OR “回忆” OR “缅怀”OR “版画” OR  
5 “缝纫” OR “针织” OR “博物馆” OR “画廊” ) AND (“随机对照试验”)  
6  
7  
8  
9  
10  
11  
12  
13  
14  
15  
16  
17  
18  
19  
20  
21  
22  
23  
24  
25  
26  
27  
28  
29  
30  
31  
32  
33  
34  
35  
36  
37  
38  
39  
40  
41  
42  
43  
44  
45  
46  
47  
48  
49  
50  
51  
52  
53  
54  
55  
56  
57  
58  
59  
60

For peer review only



**PRISMA-P (Preferred Reporting Items for Systematic review and Meta-Analysis Protocols) 2015 checklist: recommended items to address in a systematic review protocol\***

| Section and topic                 | Item No | Checklist item                                                                                                                                                                                                                | Page  |
|-----------------------------------|---------|-------------------------------------------------------------------------------------------------------------------------------------------------------------------------------------------------------------------------------|-------|
| <b>ADMINISTRATIVE INFORMATION</b> |         |                                                                                                                                                                                                                               |       |
| Title:                            |         |                                                                                                                                                                                                                               |       |
| Identification                    | 1a      | Identify the report as a protocol of a systematic review                                                                                                                                                                      | 1     |
| Update                            | 1b      | If the protocol is for an update of a previous systematic review, identify as such                                                                                                                                            | NA    |
| Registration                      | 2       | If registered, provide the name of the registry (such as PROSPERO) and registration number                                                                                                                                    | 2     |
| Authors:                          |         |                                                                                                                                                                                                                               |       |
| Contact                           | 3a      | Provide name, institutional affiliation, e-mail address of all protocol authors; provide physical mailing address of corresponding author                                                                                     | 1     |
| Contributions                     | 3b      | Describe contributions of protocol authors and identify the guarantor of the review                                                                                                                                           | 13-14 |
| Amendments                        | 4       | If the protocol represents an amendment of a previously completed or published protocol, identify as such and list changes; otherwise, state plan for documenting important protocol amendments                               | NA    |
| Support:                          |         |                                                                                                                                                                                                                               |       |
| Sources                           | 5a      | Indicate sources of financial or other support for the review                                                                                                                                                                 | 14    |
| Sponsor                           | 5b      | Provide name for the review funder and/or sponsor                                                                                                                                                                             | 14    |
| Role of sponsor or funder         | 5c      | Describe roles of funder(s), sponsor(s), and/or institution(s), if any, in developing the protocol                                                                                                                            | 14    |
| <b>INTRODUCTION</b>               |         |                                                                                                                                                                                                                               |       |
| Rationale                         | 6       | Describe the rationale for the review in the context of what is already known                                                                                                                                                 | 3-5   |
| Objectives                        | 7       | Provide an explicit statement of the question(s) the review will address with reference to participants, interventions, comparators, and outcomes (PICO)                                                                      | 3-5   |
| <b>METHODS</b>                    |         |                                                                                                                                                                                                                               |       |
| Eligibility criteria              | 8       | Specify the study characteristics (such as PICO, study design, setting, time frame) and report characteristics (such as years considered, language, publication status) to be used as criteria for eligibility for the review | 6-7   |
| Information sources               | 9       | Describe all intended information sources (such as electronic databases, contact with study authors, trial registers or other grey literature sources) with planned dates of coverage                                         | 8     |
| Search strategy                   | 10      | Present draft of search strategy to be used for at least one electronic database, including planned limits, such that it could be repeated                                                                                    | 8     |
| Study records:                    |         |                                                                                                                                                                                                                               |       |
| Data management                   | 11a     | Describe the mechanism(s) that will be used to manage records and data throughout the review                                                                                                                                  | 8     |

|                                    |     |                                                                                                                                                                                                                                                  |      |
|------------------------------------|-----|--------------------------------------------------------------------------------------------------------------------------------------------------------------------------------------------------------------------------------------------------|------|
| Selection process                  | 11b | State the process that will be used for selecting studies (such as two independent reviewers) through each phase of the review (that is, screening, eligibility and inclusion in meta-analysis)                                                  | 8    |
| Data collection process            | 11c | Describe planned method of extracting data from reports (such as piloting forms, done independently, in duplicate), any processes for obtaining and confirming data from investigators                                                           | 8-9  |
| Data items                         | 12  | List and define all variables for which data will be sought (such as PICO items, funding sources), any pre-planned data assumptions and simplifications                                                                                          | 9    |
| Outcomes and prioritization        | 13  | List and define all outcomes for which data will be sought, including prioritization of main and additional outcomes, with rationale                                                                                                             | 7    |
| Risk of bias in individual studies | 14  | Describe anticipated methods for assessing risk of bias of individual studies, including whether this will be done at the outcome or study level, or both; state how this information will be used in data synthesis                             | 9-10 |
| Data synthesis                     | 15a | Describe criteria under which study data will be quantitatively synthesised                                                                                                                                                                      | 10   |
|                                    | 15b | If data are appropriate for quantitative synthesis, describe planned summary measures, methods of handling data and methods of combining data from studies, including any planned exploration of consistency (such as $I^2$ , Kendall's $\tau$ ) | 10   |
|                                    | 15c | Describe any proposed additional analyses (such as sensitivity or subgroup analyses, meta-regression)                                                                                                                                            | 11   |
|                                    | 15d | If quantitative synthesis is not appropriate, describe the type of summary planned                                                                                                                                                               | NA   |
| Meta-bias(es)                      | 16  | Specify any planned assessment of meta-bias(es) (such as publication bias across studies, selective reporting within studies)                                                                                                                    | 11   |
| Confidence in cumulative evidence  | 17  | Describe how the strength of the body of evidence will be assessed (such as GRADE)                                                                                                                                                               | 12   |

**\* It is strongly recommended that this checklist be read in conjunction with the PRISMA-P Explanation and Elaboration (cite when available) for important clarification on the items. Amendments to a review protocol should be tracked and dated. The copyright for PRISMA-P (including checklist) is held by the PRISMA-P Group and is distributed under a Creative Commons Attribution Licence 4.0.**

*From: Shamseer L, Moher D, Clarke M, Ghersi D, Liberati A, Petticrew M, Shekelle P, Stewart L, PRISMA-P Group. Preferred reporting items for systematic review and meta-analysis protocols (PRISMA-P) 2015: elaboration and explanation. BMJ. 2015 Jan 2;349(jan02 1):g7647.*

# BMJ Open

## Art therapies improve cognitive function in elderly with subjective cognitive decline: a protocol for a network meta-analysis

|                                 |                                                                                                                                                                                                                                                                                                                                                                               |
|---------------------------------|-------------------------------------------------------------------------------------------------------------------------------------------------------------------------------------------------------------------------------------------------------------------------------------------------------------------------------------------------------------------------------|
| Journal:                        | <i>BMJ Open</i>                                                                                                                                                                                                                                                                                                                                                               |
| Manuscript ID                   | bmjopen-2023-079146.R1                                                                                                                                                                                                                                                                                                                                                        |
| Article Type:                   | Protocol                                                                                                                                                                                                                                                                                                                                                                      |
| Date Submitted by the Author:   | 08-Feb-2024                                                                                                                                                                                                                                                                                                                                                                   |
| Complete List of Authors:       | Liu, Qian; Sichuan University West China Hospital<br>Wang, Fang; Sichuan University West China Hospital, West China School of Nursing/Innovation Center of Nursing Research, Nursing Key Laboratory of Sichuan Province, National Clinical Research Center for Geriatrics<br>Tan, Lixia; Sichuan University<br>Liu, Li; Sichuan University<br>Hu, Xiuying; Sichuan University |
| <b>Primary Subject Heading</b>: | Nursing                                                                                                                                                                                                                                                                                                                                                                       |
| Secondary Subject Heading:      | Nursing                                                                                                                                                                                                                                                                                                                                                                       |
| Keywords:                       | Delirium & cognitive disorders < PSYCHIATRY, Nursing Care, Systematic Review, Protocols & guidelines < HEALTH SERVICES ADMINISTRATION & MANAGEMENT                                                                                                                                                                                                                            |
|                                 |                                                                                                                                                                                                                                                                                                                                                                               |

SCHOLARONE™  
Manuscripts

## Title page

### Title

Art therapies improve cognitive function in elderly with subjective cognitive decline: a protocol for a network meta-analysis

### List of all authors

Qian Liu<sup>1,#</sup>, Fang Wang<sup>1,#</sup>, Lixia Tan<sup>1</sup>, Li Liu<sup>1</sup>, Xiuying Hu<sup>1,\*</sup>

<sup>1</sup> Innovation Center of Nursing Research, Nursing Key Laboratory of Sichuan Province, West China Hospital, Sichuan University/West China School of Nursing, Sichuan University, China.

# These authors contributed equally to this work

\* Corresponding author: Xiuying Hu. Innovation Center of Nursing Research, Nursing Key Laboratory of Sichuan Province, West China Hospital, Sichuan University/West China School of Nursing, Sichuan University, PO Box No.37 Guo Xue Street, Chengdu, Sichuan 610041, PR China. Electronic address: [huxiuying@scu.edu.cn](mailto:huxiuying@scu.edu.cn).

### Authors' contributions

Qian Liu designed this study with oversight by Xiuying Hu. Qian Liu drafted the protocol, and the draft was modified by Fang Wang and Li Liu. Qian Liu and Lixia Tan will search, select, and identify studies included, and extract data independently, while Li Liu will be the third reviewer for study selection and data extraction. Qian Liu will be responsible for methodology. All authors have approved the publication of this protocol.

1  
2  
3  
4 1 Art therapies improve cognitive function in elderly with subjective  
5  
6 2 cognitive decline: a protocol for a network meta-analysis  
7  
8  
9 3

10  
11  
12 4 **Abstract**  
13

14 5 Introduction: Subjective cognitive decline means a decline in the subjective  
15  
16 6 perception of self-cognitive function, which is likely to evolve into mild cognitive  
17  
18 7 impairment and dementia. The number of elderly with subjective cognitive decline  
19  
20 8 has increased, bringing huge burdens and challenges to caregivers and society. With  
21  
22 9 the increase in research on art therapies, some of them have gradually been proven to  
23  
24 10 be effective for cognitive function. Therefore, this study aims to summarize the  
25  
26 11 evidence and identify the best art therapy for elderly with subjective cognitive  
27  
28 12 decline.  
29  
30  
31  
32  
33  
34

35 13 Methods and analysis: We will include published randomized controlled trials  
36  
37 14 written in English and Chinese if the intervention is one of the art therapies and  
38  
39 15 applied in people aged 60 and above with subjective cognitive decline. Eight  
40  
41 16 electronic databases, including the Cochrane Central Register of Controlled Trials,  
42  
43 17 PubMed, Web of Science, Elsevier, China BioMedical Literature Database, China  
44  
45 18 National Knowledge Infrastructure, VIP Database, and Wanfang Database, will be  
46  
47 19 searched from January 2013 to present. Art therapies will mainly include music  
48  
49 20 therapy, reminiscence therapy, painting therapy, dance therapy, reading therapy,  
50  
51 21 horticultural therapy, museum therapy, calligraphy therapy, and so on. The outcome  
52  
53 22 will be cognitive function. Study selection, data extraction and quality assessment will  
54  
55  
56  
57  
58  
59  
60

1 be performed by two reviewers. The risk of bias will be evaluated according to the  
2 Cochrane Collaboration's risk of bias tool, and the evidence quality will be assessed  
3 with the Grading of Recommendations Assessment, Development and Evaluation.  
4 Standard pairwise meta-analysis and Bayesian network meta-analysis will be  
5 conducted. The probabilities of each art therapy will be ranked based on the surface  
6 under the cumulative ranking curve.

7 Ethics and dissemination: Ethical approval is not required for reviewing published  
8 studies. To provide important evidence for clinicians and guideline developers, the  
9 findings of this study will be submitted to a peer-reviewed journal.

10 PROSPERO registration number: CRD42023443773.

11 Key words: subjective cognitive decline; elderly; art therapy; protocol; network  
12 meta-analysis

### 14 **Strengths and limitations of this study**

15 1. This network meta-analysis will integrate direct evidence with indirect evidence  
16 and allow the comparison of multiple art therapies in one model.

17 2. Network meta-analysis will promote precision of intervention and provide  
18 evidence for the decisions of intervention and the development of guidelines.

19 3. On account of the retrospective nature of this study, the findings may be  
20 influenced by the quantity and quality of the included studies.

## 1 Introduction

2 As a global public health problem that urgently needs to be addressed, dementia  
3 leads to the loss of reasoning, memory, language, and ultimately basic self-care skills,  
4 which places an enormous burden on families and the health-care system. The  
5 development of dementia, such as Alzheimer's disease, is insidious, with onset of  
6 clinical symptoms preceded years earlier by perceived and/or objective cognitive  
7 decline [1], which is also the early stage of mild cognitive impairment [2]. Subjective  
8 cognitive decline refers to the decline in the subjective perception of self-cognitive  
9 function compared with the previous normal state, mainly memory decline, but  
10 objective neuropsychological tests are not abnormal, and this decline is not related to  
11 other acute events [3]. Previous studies have suggested that subjective cognitive  
12 decline is a preclinical symptom of mild cognitive impairment and dementia [4-7].  
13 The risk of developing dementia in the elderly with subjective cognitive decline was  
14 2.48 times higher than that in the elderly without cognitive abnormalities, and the risk  
15 of developing mild cognitive impairment was 1.83 times higher than that in the  
16 elderly without cognitive abnormalities [7]. Moreover, the findings of a long-term  
17 observational study over 10 years indicate that subjective cognitive decline can occur  
18 10 years before the diagnosis of Alzheimer's disease [8]. Therefore, the therapeutic  
19 window for addressing Alzheimer's disease can be moved forward, and subjective  
20 cognitive decline can be regarded as an important gateway for early prevention and  
21 treatment of Alzheimer's disease, which may help alleviate the major public health  
22 problem, although there are no approved treatments for Alzheimer's disease and even

1 mild cognitive impairment [9].

2 The efficacy of pharmacological interventions is limited. To avoid the side effects  
3 of antipsychotics, more attention is given to the application of nonpharmacological  
4 interventions [10]. Art therapy is an emerging nonpharmacological intervention with  
5 distinctive features that integrates psychology, art and medicine. Art therapy can take  
6 a variety of forms, such as music, singing, dancing, reading and poetry groups,  
7 museum/gallery art and collections, creative writing, life story narrative reminiscence,  
8 painting, printmaking, collage, pottery, sewing, knitting, woodwork and gardening  
9 [11]. As a kind of nonpharmacological intervention, art therapy has been widely  
10 proven to be beneficial in the care of patients with cognitive impairment and has been  
11 used in clinical practice in Europe and the United States [12]. It is helpful to reduce  
12 the mental and behavioral abnormalities of patients and slow down the progress of  
13 cognitive impairment, to achieve great effects in treatment and care. It is suggested  
14 that music listening can help to improve both subjective memory function and  
15 objective cognitive performance in adults with subjective cognitive decline [13].  
16 Several randomized controlled trials have demonstrated that dance therapy can  
17 improve cognitive function, especially episodic memory and processing speed [14-16].  
18 Moreover, painting therapy has been proven to improve cognitive function in patients  
19 with mild cognitive impairment [17]. A narrow review has summarized the positive  
20 effects of therapeutic gardens on the health, spanning physical, social, psychological  
21 and cognitive effects[18]. Additionally, spiritual reminiscence programs using  
22 expressive arts therapy are conducive to improving cognitive function [19].



1 With the increase in relevant research, art therapy has gradually been proven to be  
2 of great significance in alleviating cognitive decline. However, the advantages and  
3 disadvantages of the effects of different art therapies on elderly with subjective  
4 cognitive decline are still inconclusive at present, and studies directly comparing the  
5 differences in various art therapies are lacking. Network meta-analysis is capable of  
6 summarizing direct and indirect evidence, thus evaluating and comparing the relative  
7 efficacy of multiple treatments[20]. More importantly, network meta-analysis can  
8 provide the ranking of intervention options in accordance with their effectiveness.  
9 Therefore, this study aims to evaluate the effects of different art therapies on cognitive  
10 function in elderly with subjective cognitive decline through a network meta-analysis,  
11 providing important evidence for care decision-making.

## 12 **Methods and analysis**

13 This network meta-analysis protocol was registered on the PROSPERO platform  
14 (CRD42023443773). The timeline of this work is planned between 28 June 2023 and  
15 31 May 2024. The results of this network meta-analysis will be reported following the  
16 Preferred Reporting Items for Systematic Review and Meta-Analysis Protocols [21].

### 17 **Eligibility criteria**

#### 18 Type of participants

19 Elderly diagnosed with subjective cognitive decline will be included. Inclusion  
20 criteria will be (1) diagnosed as subjective cognitive declined according to the criteria  
21 published by the Subjective Cognitive Decline Initiative [22,23]; (2) aged 60 and  
22 above. The exclusion criteria will be (1) complicated with nervous system diseases

1 which may cause subjective cognitive decline, such as dementia, Parkinson's disease,  
2 stroke, cephalomeningitis, and craniocerebral trauma; (2) complicated with major  
3 diseases that may affect subjective cognitive function, such as severe metabolic  
4 diseases and severe cardiopulmonary diseases; (3) complicated with severe mental  
5 illnesses, such as schizophrenia, bipolar disorder, severe depression, and severe  
6 anxiety.

#### 7 Type of studies

8 Only randomized controlled trials written in English or Chinese will be included.  
9 Cluster randomized controlled trials and cross-over randomized controlled trials will  
10 be excluded. Trials without a control group will be excluded. If the control group did  
11 not receive art therapy or usual care, the trial will also be excluded.

#### 12 Type of intervention

13 Any art therapy that is combined with usual care and implemented in elderly with  
14 subjective cognitive decline will be included. However, multi-component  
15 interventions that two or more art interventions or art therapies combined with other  
16 types of treatment (in addition to usual care) are applied in a experimental group will  
17 be excluded. These art therapies may be aimed at improving cognitive function. The  
18 types of art therapies for elderly with subjective cognitive decline may include (1)  
19 music therapy, (2) dance therapy, (3) reading therapy, (4) painting therapy, (5)  
20 horticultural therapy, (6) reminiscence therapy, (7) calligraphy therapy, and (8)  
21 museum therapy.

#### 22 Comparison

1  
2  
3  
4 1 Comparator will be considered a usual care of subjective cognitive decline (such as  
5  
6 2 guidance of drugs, diet, rehabilitation and complication prevention) or another art  
7  
8 3 therapy combined with usual care.  
9  
10

#### 11 4 Type of outcomes

12  
13  
14 5 The outcome will focus on cognitive function, which might be measured by a  
15  
16 6 validated cognitive outcome measure, for example, subjective cognitive decline  
17  
18 7 Questionnaire, the Mini-Mental State Examination, Montreal Cognitive Assessment,  
19  
20 8 Addenbrooke's Cognitive Examination-III, Mini-Addenbrooke's Cognitive  
21  
22 9 Examination, Memory Impairment Screen, Quick Screen for Mild Cognitive  
23  
24 10 Impairment, Clock-Drawing Test, or Repeatable Battery for the Assessment of  
25  
26 11 Neuropsychological Status. Subjective cognitive decline will be reported by using the  
27  
28 12 original scores after intervention in the original study.  
29  
30  
31  
32  
33

#### 34 13 **Data sources and search strategy**

35  
36  
37 14 The search used a combination of Medical Subject Headings and free words for  
38  
39 15 professional searches. The search items will include subjective cognitive decline or  
40  
41 16 SCD, art therapy (music\* or singing or danc\* or painting or drawing or collage or  
42  
43 17 clay or theatre or drama or reading or poetry or woodwork or garden\* or horticultural  
44  
45 18 or handwriting or penmanship or calligraphy or ceramics or pottery or writing or  
46  
47 19 sculpture or carving or narrative or reminiscence or printmaking or sewing or knitting  
48  
49 20 or museum or gallery) and randomized controlled trial. Searches will be undertaken in  
50  
51 21 electronic databases to identify published studies, including the Cochrane Central  
52  
53 22 Register of Controlled Trials, PubMed, Web of Science, Elsevier, China BioMedical  
54  
55  
56  
57  
58  
59  
60

1  
2  
3  
4 1 Literature Database, China National Knowledge Infrastructure, VIP Database, and  
5  
6 2 Wanfang Database. A draft search strategy is summarized in Supplementary Material  
7  
8  
9 3 1. The retrieval time will be from January 2013 to the present. In addition to the  
10  
11 4 database search, the references of the included studies will be scanned to identify  
12  
13  
14 5 additional eligible studies.

### 6 **Study selection**

7 All investigators will receive appropriate training prior to study selection. All  
8  
9 retrieved studies will be imported into NoteExpress software to download references.  
10  
11 Duplicate studies will be removed. The titles and abstracts of selected studies will be  
12  
13 screened independently by two reviewers to exclude studies that obviously do not  
14  
15 meet the inclusion criteria. The preliminary results will be cross-checked. Then, the  
16  
17 remaining full-text studies will be examined independently by the same two reviewers  
18  
19 to determine eligibility. If there are disagreements, the third reviewer will be asked to  
20  
21 evaluate the full text. Any discrepancies will be resolved through group discussions.  
22  
23 We will record the excluded studies and reasons for exclusion. Figure 1 shows the  
24  
25 process of study selection.

### 26 **Data extraction**

27 All researchers of this study will discuss and design a standard form for data  
28  
29 extraction. Then, two reviewers will independently extract data in accordance with the  
30  
31 standard form, including author (s), year of publication, sample size, characteristics of  
32  
33 patients (gender and age), intervention (type, frequency and duration), and  
34  
35 measurements of outcome. After completing data extraction, the results of two  
36  
37  
38  
39  
40  
41  
42  
43  
44  
45  
46  
47  
48  
49  
50  
51  
52  
53  
54  
55  
56  
57  
58  
59  
60

1 reviewers will be crosschecked to ensure that there is no mistake. Team discussion  
2 will be used to resolve the disagreements.

### 3 **Risk of bias assessment**

4 The revised version of the Cochrane tool (RoB 2) will be used to assess the risk of  
5 bias for all included studies [24]. This tool will assess five domains, including (1) bias  
6 arising from the randomization process, (2) bias due to deviations from intended  
7 interventions, (3) bias due to missing outcome data, (4) bias in the measurement of the  
8 outcome and (5) bias in the selection of the reported result. The assessment of each  
9 domain will be rated as 'low risk of bias', 'some concerns' and 'high risk of bias'.  
10 The response options for an overall risk-of-bias judgment are the same as those for  
11 individual domains. If all domains are rated as 'low risk of bias', this trial will be  
12 judged to be at low risk of bias. If at least one domain is rated as 'some concerns' and  
13 no domain is rated as 'high risk of bias', this trial will be judged to be 'some  
14 concerns'. If at least one domain is rated as 'high risk of bias' or multiple domains are  
15 rated as 'some concerns' in a way that substantially lowers confidence in the result,  
16 this trial will be judged to be at high risk of bias. Two reviewers will independently  
17 evaluate the risk of bias for each study and then cross-check the results. Differences  
18 will be resolved through team discussion with the third reviewer.

### 19 **Statistical analysis**

#### 20 Pairwise meta-analysis

21 We will use Review Manager (version 5.3) to conduct a pairwise meta-analysis of  
22 direct evidence. For continuous outcomes, standardized mean differences with 95%

1 confidence intervals will be used. The  $\chi^2$  test will be used to assess the heterogeneity  
2 across all included trials. A fixed-effects model will be used to synthesize the  
3 standardized mean difference if the p value is  $\geq 0.1$ . Conversely, if the p value is  $< 0.1$ ,  
4 a random-effects model will be used.

#### 5 Network meta-analysis

6 Considering the expected heterogeneity between studies, the effects of different art  
7 therapies will be compared by conducting a random-effects network meta-analysis  
8 within a Bayesian framework using Markov Chains Monte Carlo in R software  
9 (version 4.1.3). Brooks-Gelman-Rubin diagnosis and potential scale reduction factor  
10 will be used to ensure the convergence of the model [25]. Moreover, the surface under  
11 the cumulative ranking curve with its 95% confidence interval and rank-heat plot will  
12 be used to evaluate the hierarchy of each art therapy [26,27].

#### 13 Dealing with missing data

14 If there is a lack of some information, the missing data will be obtained by  
15 contacting the corresponding authors whenever possible. We will try to calculate the  
16 missing data based on availability factors if there is no reply. Sensitivity analysis will  
17 be used to examine the potential impact of missing data on the results of this study.

#### 18 Assessment of publication bias

19 If more than nine studies are included in the analysis, funnel plots, Begg's rank  
20 correction and Egger's regression tests will be used to evaluate the presence of  
21 publication bias in Stata software (version 15.0) [28-30].

#### 22 Assessment of inconsistency and subgroup analysis

1 Based on a loop-special method within each loop of the network [31], the local  
2 inconsistency and global inconsistency will be measured in Stata software (version  
3 15.0) [32].<sup>[32]</sup> If there is heterogeneity or inconsistency, the sources of heterogeneity  
4 will be explored by network meta-regression. Subgroup analysis will be performed in  
5 accordance with age, gender, or duration of intervention.

#### 6 Sensitivity analysis

7 We will perform a sensitivity analysis for primary outcomes to verify the  
8 robustness of the findings. In the sensitivity analysis, trials judged to be at high risk of  
9 bias, trials with missing data and trials with the smallest sample size will be excluded.  
10 Then, to examine whether the results change and whether the transitivity (consistency  
11 and model fit) is affected, the same methods used to conduct the network  
12 meta-analysis will be repeated.

#### 13 Quality of evidence

14 We will also evaluate the quality of evidence conducting to primary outcomes based  
15 on the Grading of Recommendations Assessment, Development and Evaluation  
16 framework, in accordance with limitations of study, imprecision, heterogeneity,  
17 inconsistency, indirectness and publication bias [33].

#### 18 **Patient and Public Involvement**

19 This study is based on published data, so patients or the public were not involved in  
20 the design, conduct, reporting, and dissemination plans of our research.

#### 21 **Discussion**

22 According to a cohort study, the prevalence of subjective cognitive decline is

1  
2  
3  
4 1 currently slightly high, ranging from 7.8% to 52.7% which is based on estimated  
5  
6 2 based on age and gender standardization in the population [34]. This means that  
7  
8  
9 3 subjective cognitive decline is gradually becoming a health issue in elderly who  
10  
11 4 requires special attention. Subjective cognitive decline is an important risk factor for  
12  
13  
14 5 mild cognitive impairment and Alzheimer's disease [6], which may cause adverse  
15  
16 6 effects on the quality of life of elderly and bring enormous burdens to caregivers and  
17  
18 7 society, and obstruct the realization of healthy aging and active aging. The effects of  
19  
20 8 pharmacological intervention are limited to some extent. Nonpharmacological  
21  
22 9 interventions have become the preferred approach to treat and care for patients with  
23  
24 10 cognitive impairment because of their simplicity, easy operation and high safety [35].  
25  
26  
27  
28  
29

30 11 At present, art therapies such as music therapy, dance therapy, painting therapy,  
31  
32 12 reading therapy, horticultural therapy, reminiscence therapy, calligraphy therapy and  
33  
34 13 museum therapy have been applied to improve cognitive function in patients with  
35  
36 14 subjective cognitive decline. Music, as an artistic manifestation, offers a profound  
37  
38 15 impact on the emotional, cognitive, and physiological aspects of personal experiences  
39  
40 16 [36]. Some studies have shown that music therapy has a positive impact on  
41  
42 17 individuals with decreased cognitive function, helping improve objective and  
43  
44 18 subjective cognitive functions, such as subjective memory function [37].  
45  
46 19 Reminiscence therapy is also one of the common methods used to improve cognitive  
47  
48 20 function in the elderly, which helps stimulate autobiographical memory and  
49  
50 21 simultaneously improve mental health [38]. Horticultural therapy can promote active  
51  
52 22 contact and interaction between human and natural elements, thereby improving the  
53  
54  
55  
56  
57  
58  
59  
60



1 cognitive function and mental health of the elderly [39]. In addition, some scholars  
2 believe that horticultural therapy may improve cognition function through metabolic  
3 biomarkers such as tryptophan, kynurenine, and serotonin [40]. From the current  
4 research results, it can be seen that various art therapies have a positive effect on  
5 improving cognitive function through different means. However, to date, no network  
6 meta-analysis has been performed to evaluate the comparative efficacy of all available  
7 art therapies. Consequently, it is necessary to conduct a network meta-analysis to  
8 identify the effects of art therapies. To the best of our knowledge, this is the first  
9 network meta-analysis to analyze the effects of art therapies in elderly with subjective  
10 cognitive decline. Based on the comparative effectiveness evidence, this network  
11 meta-analysis is expected to find the best art therapy for improving cognitive function  
12 in elderly with subjective cognitive decline. The results could help patients and  
13 clinicians choose the best intervention. In addition, we hope that the results of this  
14 study could provide evidence for the recommendations of guidelines.

### 15 **Ethics and dissemination**

16 This study is based on published data, so ethical approval is not a requirement. We  
17 plan to publish the findings of this study in a peer-reviewed journal. This work is now  
18 in progress, and preparations has start on 28 June 2023. We are searching the relevant  
19 studies. The expected end time is 31 May 2024. The results will be reported based on  
20 the PRISMA-compliant guidelines.

### 21 **Authors' contributions**

1 Qian Liu designed this study with oversight by Xiuying Hu. Qian Liu drafted the  
2 protocol, and the draft was modified by Fang Wang and Li Liu. Qian Liu and Lixia  
3 Tan will search, select, and identify studies, and extract data independently, while Li  
4 Liu will be the third reviewer for study selection and data extraction. Qian Liu will be  
5 responsible for the methodology. All authors have approved the publication of this  
6 protocol.

### 7 **Funding statement**

8 This study is funded by a project from the West China Hospital of Sichuan  
9 University and University of Electronic Science and Technology of China (Grant No.  
10 HXDZ21003) and the Institutional Research Fund from Sichuan University  
11 (2022SCUH0030).

### 12 **Competing interests statement**

13 The authors have no conflicts of interest to disclose.

### 15 **References**

- 16 [1] Alzheimer's Association. 2015 Alzheimer's disease facts and figures. *Alzheimers*  
17 *Dement* 2015;11(3):332-84.
- 18 [2] Jack CR Jr, Bennett DA, Blennow K, *et al.* NIA-AA Research Framework:  
19 Toward a biological definition of Alzheimer's disease. *Alzheimers Dement* 2018;  
20 14(4):535-562.
- 21 [3] Jessen F, Amariglio RE, van Boxtel M, *et al.* A conceptual framework for research  
22 on subjective cognitive decline in preclinical Alzheimer's disease. *Alzheimers Dement*  
23 2014;10(6):844-52.
- 24 [4] Lin Y, Shan PY, Jiang WJ, *et al.* Subjective cognitive decline: preclinical  
25 manifestation of Alzheimer's disease. *Neurol Sci* 2019;40(1):41-49.
- 26 [5] Slot RER, Sikkes SAM, Berkhof J, *et al.* Subjective cognitive decline and rates of  
27 incident Alzheimer's disease and non-Alzheimer's disease dementia. *Alzheimers*  
28 *Dement* 2019;15(3):465-476.
- 29 [6] Colijn MA, Grossberg GT. Amyloid and Tau Biomarkers in Subjective Cognitive  
30 Impairment. *J Alzheimers Dis* 2015;47(1):1-8.

- 1 [7] Pike KE, Cavuoto MG, Li L, *et al.* Subjective Cognitive Decline: Level of Risk for  
2 Future Dementia and Mild Cognitive Impairment, a Meta-Analysis of Longitudinal  
3 Studies. *Neuropsychol Rev* 2022;32(4):703-735.
- 4 [8] Verlinden VJA, van der Geest JN, de Bruijn RFAG, *et al.* Trajectories of decline  
5 in cognition and daily functioning in preclinical dementia. *Alzheimers Dement*  
6 2016;12(2):144-153.
- 7 [9] Sperling RA, Jack CR Jr, Aisen PS. Testing the right target and right drug at the  
8 right stage. *Sci Transl Med* 2011;3(111):111cm33.
- 9 [10] Abraha I, Rimland JM, Trotta FM, *et al.* Systematic review of systematic reviews  
10 of non-pharmacological interventions to treat behavioural disturbances in older  
11 patients with dementia. The SENATOR-OnTop series. *BMJ Open* 2017; 7 (3):  
12 e012759.
- 13 [11] Roe B. Arts for health initiatives: an emerging international agenda and evidence  
14 base for older populations. *J Adv Nurs* 2014; 70 (1): 1-3.
- 15 [12] Camic PM, Zeilig H, Crutch SJ. The arts and dementia: Emerging directions for  
16 theory, research and practice. *Dementia (London)* 2018; 17 (6): 641-644.
- 17 [13] Innes KE, Selfe TK, Khalsa DS, *et al.* Meditation and Music Improve Memory  
18 and Cognitive Function in Adults with Subjective Cognitive Decline: A Pilot  
19 Randomized Controlled Trial. *J Alzheimers Dis* 2017;56(3):899-916.
- 20 [14] Zhu Y, Wu H, Qi M, *et al.* Effects of a specially designed aerobic dance routine  
21 on mild cognitive impairment. *Clin Interv Aging* 2018; 13: 1691-1700.
- 22 [15] Doi T, Verghese J, Makizako H, *et al.* Effects of Cognitive Leisure Activity on  
23 Cognition in Mild Cognitive Impairment: Results of a Randomized Controlled Trial. *J*  
24 *Am Med Dir Assoc* 2017; 18 (8): 686-691.
- 25 [16] Borges EGDS, Vale RGS, Pernambuco CS, *et al.* Effects of dance on the postural  
26 balance, cognition and functional autonomy of older adults. *Rev Bras Enferm* 2018;  
27 71 (suppl 5): 2302-2309.
- 28 [17] Zhao J, Li H, Lin R, *et al.* Effects of creative expression therapy for older adults  
29 with mild cognitive impairment at risk of Alzheimer's disease: a randomized  
30 controlled clinical trial. *Clin Interv Aging* 2018; 13: 1313-1320.
- 31 [18] Uwajeh PC, Iyendo TO, Polay M. Therapeutic gardens as a design approach for  
32 optimising the healing environment of patients with Alzheimer's disease and other  
33 dementias: A narrative review. *Explore (NY)* 2019; 15 (5): 352-362.
- 34 [19] Ho YV. A pilot study of spiritual reminiscence programme using expressive arts  
35 therapy for the older adults with mild cognitive impairment staying in nursing home.  
36 *Hong Kong: The University of Hong Kong*, 2017.
- 37 [20] Li J, Zhong D, Ye J, *et al.* Rehabilitation for balance impairment in patients after  
38 stroke: a protocol of a systematic review and network meta-analysis. *BMJ Open* 2019;  
39 9 (7): e026844.
- 40 [21] Shamseer L, Moher D, Clarke M, *et al.* Preferred reporting items for systematic  
41 review and meta-analysis protocols (PRISMA-P) 2015: elaboration and explanation.  
42 *BMJ* 2015; 350: g7647.
- 43 [22] Molinuevo JL, Rabin LA, Amariglio R, *et al.* Implementation of subjective  
44 cognitive decline criteria in research studies. *Alzheimers Dement* 2017;13(3):296-311.

1  
2  
3  
4  
5  
6  
7  
8  
9  
10  
11  
12  
13  
14  
15  
16  
17  
18  
19  
20  
21  
22  
23  
24  
25  
26  
27  
28  
29  
30  
31  
32  
33  
34  
35  
36  
37  
38  
39  
40  
41  
42  
43  
44  
45  
46  
47  
48  
49  
50  
51  
52  
53  
54  
55  
56  
57  
58  
59  
60

- [23] Song YH, Liu YS, Yang Q, *et al.* Correlation of Subjective Cognitive Decline with Multimorbidity among Elderly People. *Chinese General Practice* 2023; 26(10):1241-1249. (in Chinese)
- [24] Sterne JAC, Savović J, Page MJ, *et al.* RoB 2: a revised tool for assessing risk of bias in randomised trials. *BMJ* 2019; 366:14898.
- [25] Brooks SP, Gelman A. Alternative methods for monitoring convergence of iterative simulations. *J Comput Graph Stat* 1998; 7: 434-45.
- [26] Salanti G, Ades AE, Ioannidis JP. Graphical methods and numerical summaries for presenting results from multiple-treatment meta-analysis: an overview and tutorial. *J Clin Epidemiol* 2011; 64 (2): 163-71.
- [27] Veroniki AA, Straus SE, Fyraridis A, *et al.* The rank-heat plot is a novel way to present the results from a network meta-analysis including multiple outcomes. *J Clin Epidemiol* 2016; 76: 193-9.
- [28] Collaboration TC. Cochrane Handbook for systematic reviews of interventions version 5.1.0, 2011.
- [29] Begg CB, Mazumdar M. Operating characteristics of a RANK correlation test for publication bias. *Biometrics* 1994; 50: 1088-1101.
- [30] Egger M, Smith GD, Schneider M, *et al.* Bias in meta-analysis detected by a simple, graphical test. *BMJ* 1997; 315: 629-34.
- [31] Du Y, Wu F, Lu S, *et al.* Efficacy of pressure ulcer prevention interventions in adult intensive care units: a protocol for a systematic review and network meta-analysis. *BMJ Open* 2019; 9 (4): e026727.
- [32] Higgins JP, Jackson D, Barrett JK, *et al.* Consistency and inconsistency in network meta-analysis: concepts and models for multi-arm studies. *Res Synth Methods* 2012; 3 (2): 98-110.
- [33] Puhan MA, Schünemann HJ, Murad MH, *et al.* A GRADE Working Group approach for rating the quality of treatment effect estimates from network meta-analysis. *BMJ* 2014; 349: g5630.
- [34] Röhr S, Pabst A, Riedel-Heller SG, *et al.* Estimating prevalence of subjective cognitive decline in and across international cohort studies of aging: a COSMIC study. *Alzheimers Res Ther* 2020;12(1):167.
- [35] Calsolaro V, Antognoli R, Okoye C, *et al.* The Use of Antipsychotic Drugs for Treating Behavioral Symptoms in Alzheimer's Disease. *Front Pharmacol* 2019;10: 1465.
- [36] Gómez-Carballa A, Navarro L, Pardo-Seco J, *et al.* Music compensates for altered gene expression in age-related cognitive disorders. *Sci Rep* 2023;13(1):21259.
- [37] Kim J, Cuevas H, Wood ST. Effect of Music Interventions on Cognitive Function in Older Adults With Mild Cognitive Impairment: A Systematic Review. *Res Gerontol Nurs* 2023;16(5):259-268.
- [38] Villasán-Rueda A, Sánchez-Cabaco A, Mejía-Ramírez M, *et al.* Transcultural Pilot Study of the Efficacy of Reminiscence Therapy for Mexican and Spanish Older Adults with Different Levels of Cognitive Decline. *J Cross Cult Gerontol* 2023;38(4):371-388.
- [39] Wang M, Wu J, Yan H. The effect of horticultural therapy on older adults in

1 pension institutions: a systematic review. *Geriatr Nurs* 2023;51:25-32.  
2 [40]Park SA, Son SY, Lee AY, *et al.* Metabolite Profiling Revealed That a Gardening  
3 Activity Program Improves Cognitive Ability Correlated with BDNF Levels and  
4 Serotonin Metabolism in the Elderly. *Int J Environ Res Public Health*.  
5 2020;17(2):541.  
6  
7  
8  
9  
10  
11  
12  
13  
14  
15  
16  
17  
18  
19  
20  
21  
22  
23  
24  
25  
26  
27  
28  
29  
30  
31  
32  
33  
34  
35  
36  
37  
38  
39  
40  
41  
42  
43  
44  
45  
46  
47  
48  
49  
50  
51  
52  
53  
54  
55  
56  
57  
58  
59  
60

For peer review only

1  
2  
3  
4  
5  
6  
7  
8  
9  
10  
11  
12  
13  
14  
15  
16  
17  
18  
19  
20  
21  
22  
23  
24  
25  
26  
27  
28  
29  
30  
31  
32  
33  
34  
35  
36  
37  
38  
39  
40  
41  
42  
43  
44  
45  
46  
47  
48  
49  
50  
51  
52  
53  
54  
55  
56  
57  
58  
59  
60

- 1 **Figure legend**
- 2 Figure 1. Study flow diagram

For peer review only

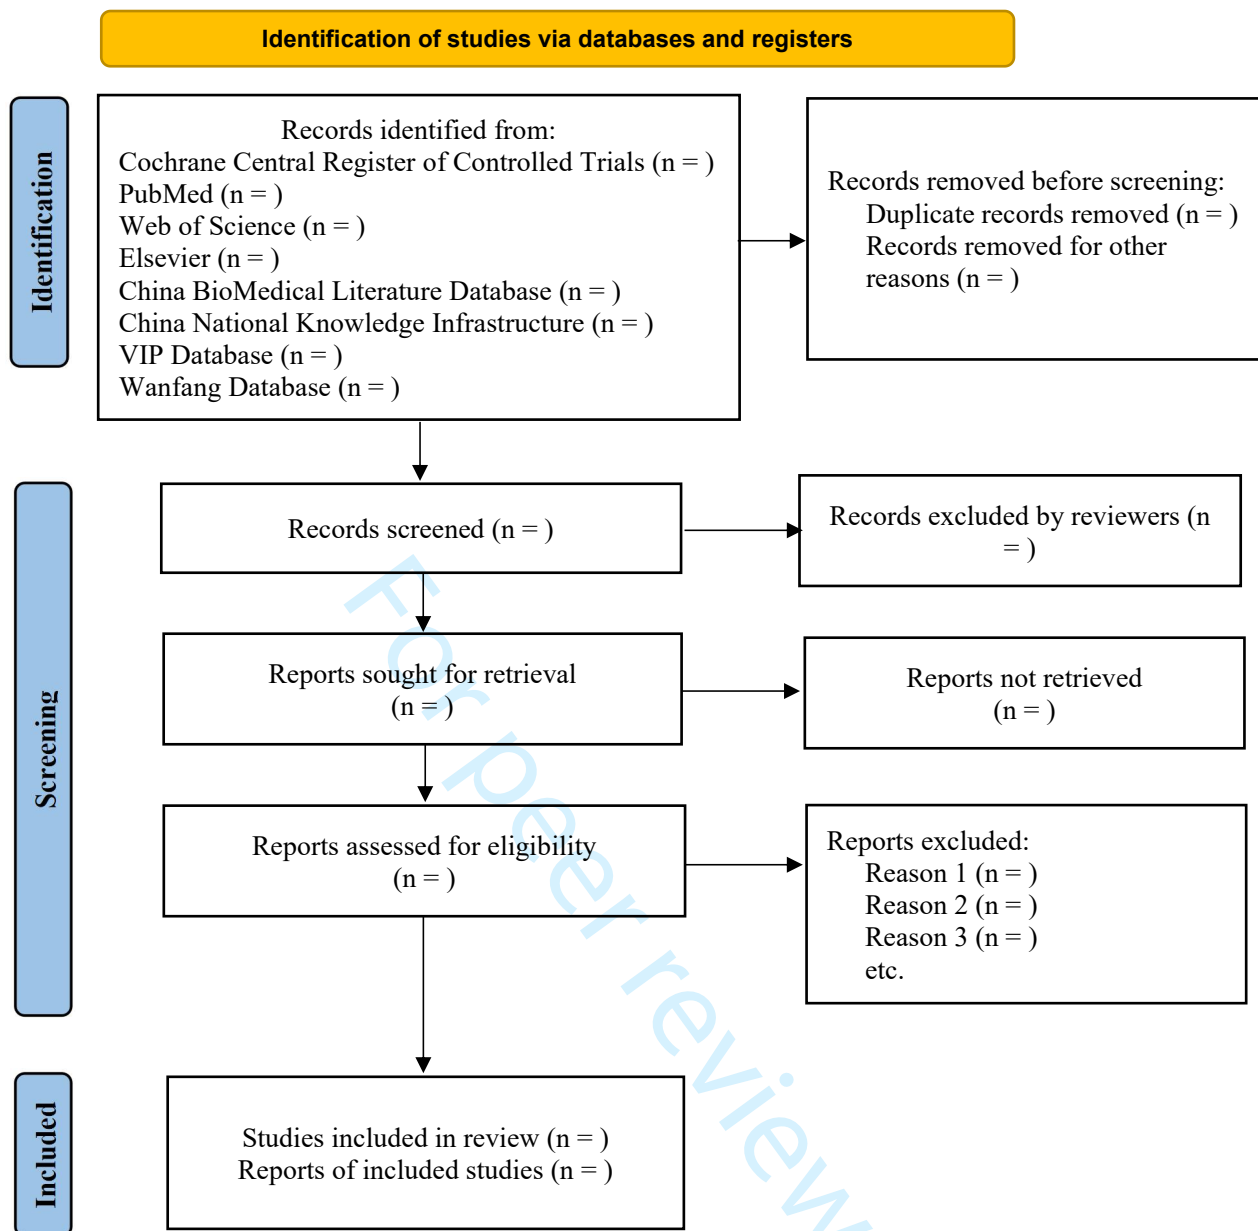

Fig. 1 The processes of study selection

## Supplementary Material 1: Search strategy

### 1. Cochrane Central Register of Controlled Trials

(subjective cognitive decline OR SCD) AND (art therapy OR music\* OR singing OR danc\* OR painting OR drawing OR collage OR clay OR theatre OR drama OR reading OR poetry OR woodwork OR garden\* OR horticultural OR handwriting OR penmanship OR calligraphy OR ceramics OR pottery OR writing OR sculpture OR carving OR narrative OR reminiscence OR printmaking OR sewing OR knitting OR museum OR gallery) AND (randomized controlled trial OR RCT).

### 2. PubMed

("subjective cognitive decline" OR "SCD") AND ("art therapy" OR "music\*" OR "singing" OR "danc\*" OR "painting" OR "drawing" OR "collage" OR "clay" OR "theatre" OR "drama" OR "reading" OR "poetry" OR "woodwork" OR "garden\*" OR "horticultural" OR "handwriting" OR "penmanship" OR "calligraphy" OR "ceramics" OR "pottery" OR "writing" OR "sculpture" OR "carving" OR "narrative" OR "reminiscence" OR "printmaking" OR "sewing" OR "knitting" OR "museum" OR "gallery") AND ("randomized controlled trial" OR "RCT").

### 3. Web of Science

(TS =subjective cognitive decline OR TS =SCD) AND (TS =art therapy OR TS =music\* OR TS =singing OR TS =danc\* OR TS =painting OR TS =drawing OR TS =collage OR TS =clay OR TS =theatre OR TS =drama OR TS =reading OR TS =poetry OR TS =woodwork OR TS =garden\* OR TS =horticultural OR TS =handwriting OR TS =penmanship OR TS =calligraphy OR TS =ceramics OR TS =pottery OR TS =writing OR TS =sculpture OR TS =carving OR TS =narrative OR TS =reminiscence OR TS =printmaking OR TS =sewing OR TS =knitting OR TS =museum OR TS =gallery) AND (TS =randomized controlled trial OR TS =RCT).

### 4. Elsevier



(subjective cognitive decline OR SCD) AND (art therapy OR music\* OR singing OR danc\* OR painting OR drawing OR collage OR clay OR theatre OR drama OR reading OR poetry OR woodwork OR garden\* OR horticultural OR handwriting OR penmanship OR calligraphy OR ceramics OR pottery OR writing OR sculpture OR carving OR narrative OR reminiscence OR printmaking OR sewing OR knitting OR museum OR gallery) AND (randomized controlled trial OR RCT).

### **5. China BioMedical Literature Database**

(“主观认知能力下降” OR “主观认知下降”) AND (“音乐” OR “舞蹈” OR “绘画” OR “拼贴” OR “黏土” OR “戏剧” OR “诗歌” OR “阅读” OR “园艺” OR “书法” OR “陶艺” OR “写作” OR “雕塑” OR “叙事” OR “回忆” OR “缅怀” OR “版画” OR “缝纫” OR “针织” OR “博物馆” OR “画廊”) AND (“随机对照试验”)

### **6. China National Knowledge Infrastructure**

(SU=主观认知能力下降 OR SU=主观认知下降) AND (SU=音乐 OR SU=舞蹈 OR SU=绘画 OR SU=拼贴 OR SU=黏土 OR SU=戏剧 OR SU=诗歌 OR SU=阅读 OR SU=园艺 OR SU=书法 OR SU=陶艺 OR SU=写作 OR SU=雕塑 OR SU=叙事 OR SU=回忆 OR SU=缅怀 OR SU=版画 OR SU=缝纫 OR SU=针织 OR SU=博物馆 OR SU=画廊) AND (SU=随机对照试验)

### **7. VIP Database**

(“主观认知能力下降” OR “主观认知下降”) AND (“音乐” OR “舞蹈” OR “绘画” OR “拼贴” OR “黏土” OR “戏剧” OR “诗歌” OR “阅读” OR “园艺” OR “书法” OR “陶艺” OR “写作” OR “雕塑” OR “叙事” OR “回忆” OR “缅怀” OR “版画” OR “缝纫” OR “针织” OR “博物馆” OR “画廊”) AND (“随机对照试验”)

### **8. Wanfang Database**

(“主观认知能力下降” OR “主观认知下降”) AND (“音乐” OR “舞蹈” OR “绘画” OR “拼贴” OR “黏土” OR “戏剧” OR “诗歌” OR “阅读” OR “园艺” OR “书法”

1  
2  
3  
4 OR “陶艺 OR “写作” OR “雕塑” OR “叙事” OR “回忆” OR “缅怀”OR “版画” OR  
5 “缝纫” OR “针织” OR “博物馆” OR “画廊” ) AND (“随机对照试验”)  
6  
7  
8  
9  
10  
11  
12  
13  
14  
15  
16  
17  
18  
19  
20  
21  
22  
23  
24  
25  
26  
27  
28  
29  
30  
31  
32  
33  
34  
35  
36  
37  
38  
39  
40  
41  
42  
43  
44  
45  
46  
47  
48  
49  
50  
51  
52  
53  
54  
55  
56  
57  
58  
59  
60

For peer review only

**PRISMA-P (Preferred Reporting Items for Systematic review and Meta-Analysis Protocols) 2015 checklist: recommended items to address in a systematic review protocol\***

| Section and topic                 | Item No | Checklist item                                                                                                                                                                                                                | Page  |
|-----------------------------------|---------|-------------------------------------------------------------------------------------------------------------------------------------------------------------------------------------------------------------------------------|-------|
| <b>ADMINISTRATIVE INFORMATION</b> |         |                                                                                                                                                                                                                               |       |
| Title:                            |         |                                                                                                                                                                                                                               |       |
| Identification                    | 1a      | Identify the report as a protocol of a systematic review                                                                                                                                                                      | 1     |
| Update                            | 1b      | If the protocol is for an update of a previous systematic review, identify as such                                                                                                                                            | NA    |
| Registration                      | 2       | If registered, provide the name of the registry (such as PROSPERO) and registration number                                                                                                                                    | 2     |
| Authors:                          |         |                                                                                                                                                                                                                               |       |
| Contact                           | 3a      | Provide name, institutional affiliation, e-mail address of all protocol authors; provide physical mailing address of corresponding author                                                                                     | 1     |
| Contributions                     | 3b      | Describe contributions of protocol authors and identify the guarantor of the review                                                                                                                                           | 13-14 |
| Amendments                        | 4       | If the protocol represents an amendment of a previously completed or published protocol, identify as such and list changes; otherwise, state plan for documenting important protocol amendments                               | NA    |
| Support:                          |         |                                                                                                                                                                                                                               |       |
| Sources                           | 5a      | Indicate sources of financial or other support for the review                                                                                                                                                                 | 14    |
| Sponsor                           | 5b      | Provide name for the review funder and/or sponsor                                                                                                                                                                             | 14    |
| Role of sponsor or funder         | 5c      | Describe roles of funder(s), sponsor(s), and/or institution(s), if any, in developing the protocol                                                                                                                            | 14    |
| <b>INTRODUCTION</b>               |         |                                                                                                                                                                                                                               |       |
| Rationale                         | 6       | Describe the rationale for the review in the context of what is already known                                                                                                                                                 | 3-5   |
| Objectives                        | 7       | Provide an explicit statement of the question(s) the review will address with reference to participants, interventions, comparators, and outcomes (PICO)                                                                      | 3-5   |
| <b>METHODS</b>                    |         |                                                                                                                                                                                                                               |       |
| Eligibility criteria              | 8       | Specify the study characteristics (such as PICO, study design, setting, time frame) and report characteristics (such as years considered, language, publication status) to be used as criteria for eligibility for the review | 6-7   |
| Information sources               | 9       | Describe all intended information sources (such as electronic databases, contact with study authors, trial registers or other grey literature sources) with planned dates of coverage                                         | 8     |
| Search strategy                   | 10      | Present draft of search strategy to be used for at least one electronic database, including planned limits, such that it could be repeated                                                                                    | 8     |
| Study records:                    |         |                                                                                                                                                                                                                               |       |
| Data management                   | 11a     | Describe the mechanism(s) that will be used to manage records and data throughout the review                                                                                                                                  | 8     |

|                                    |     |                                                                                                                                                                                                                                                     |      |
|------------------------------------|-----|-----------------------------------------------------------------------------------------------------------------------------------------------------------------------------------------------------------------------------------------------------|------|
| Selection process                  | 11b | State the process that will be used for selecting studies (such as two independent reviewers) through each phase of the review (that is, screening, eligibility and inclusion in meta-analysis)                                                     | 8    |
| Data collection process            | 11c | Describe planned method of extracting data from reports (such as piloting forms, done independently, in duplicate), any processes for obtaining and confirming data from investigators                                                              | 8-9  |
| Data items                         | 12  | List and define all variables for which data will be sought (such as PICO items, funding sources), any pre-planned data assumptions and simplifications                                                                                             | 9    |
| Outcomes and prioritization        | 13  | List and define all outcomes for which data will be sought, including prioritization of main and additional outcomes, with rationale                                                                                                                | 7    |
| Risk of bias in individual studies | 14  | Describe anticipated methods for assessing risk of bias of individual studies, including whether this will be done at the outcome or study level, or both; state how this information will be used in data synthesis                                | 9-10 |
| Data synthesis                     | 15a | Describe criteria under which study data will be quantitatively synthesised                                                                                                                                                                         | 10   |
|                                    | 15b | If data are appropriate for quantitative synthesis, describe planned summary measures, methods of handling data and methods of combining data from studies, including any planned exploration of consistency (such as I <sup>2</sup> , Kendall's τ) | 10   |
|                                    | 15c | Describe any proposed additional analyses (such as sensitivity or subgroup analyses, meta-regression)                                                                                                                                               | 11   |
|                                    | 15d | If quantitative synthesis is not appropriate, describe the type of summary planned                                                                                                                                                                  | NA   |
| Meta-bias(es)                      | 16  | Specify any planned assessment of meta-bias(es) (such as publication bias across studies, selective reporting within studies)                                                                                                                       | 11   |
| Confidence in cumulative evidence  | 17  | Describe how the strength of the body of evidence will be assessed (such as GRADE)                                                                                                                                                                  | 12   |

**\* It is strongly recommended that this checklist be read in conjunction with the PRISMA-P Explanation and Elaboration (cite when available) for important clarification on the items. Amendments to a review protocol should be tracked and dated. The copyright for PRISMA-P (including checklist) is held by the PRISMA-P Group and is distributed under a Creative Commons Attribution Licence 4.0.**

*From: Shamseer L, Moher D, Clarke M, Ghersi D, Liberati A, Petticrew M, Shekelle P, Stewart L, PRISMA-P Group. Preferred reporting items for systematic review and meta-analysis protocols (PRISMA-P) 2015: elaboration and explanation. BMJ. 2015 Jan 2;349(jan02 1):g7647.*

# BMJ Open

## Art therapies and cognitive function in elderly with subjective cognitive decline: a protocol for a network meta-analysis

|                                 |                                                                                                                                                                                                                                                                                                                                                                               |
|---------------------------------|-------------------------------------------------------------------------------------------------------------------------------------------------------------------------------------------------------------------------------------------------------------------------------------------------------------------------------------------------------------------------------|
| Journal:                        | <i>BMJ Open</i>                                                                                                                                                                                                                                                                                                                                                               |
| Manuscript ID                   | bmjopen-2023-079146.R2                                                                                                                                                                                                                                                                                                                                                        |
| Article Type:                   | Protocol                                                                                                                                                                                                                                                                                                                                                                      |
| Date Submitted by the Author:   | 02-Mar-2024                                                                                                                                                                                                                                                                                                                                                                   |
| Complete List of Authors:       | Liu, Qian; Sichuan University West China Hospital<br>Wang, Fang; Sichuan University West China Hospital, West China School of Nursing/Innovation Center of Nursing Research, Nursing Key Laboratory of Sichuan Province, National Clinical Research Center for Geriatrics<br>Tan, Lixia; Sichuan University<br>Liu, Li; Sichuan University<br>Hu, Xiuying; Sichuan University |
| <b>Primary Subject Heading</b>: | Nursing                                                                                                                                                                                                                                                                                                                                                                       |
| Secondary Subject Heading:      | Nursing                                                                                                                                                                                                                                                                                                                                                                       |
| Keywords:                       | Delirium & cognitive disorders < PSYCHIATRY, Nursing Care, Systematic Review, Protocols & guidelines < HEALTH SERVICES ADMINISTRATION & MANAGEMENT                                                                                                                                                                                                                            |
|                                 |                                                                                                                                                                                                                                                                                                                                                                               |

SCHOLARONE™  
Manuscripts

**Title page****Title**

Art therapies and cognitive function in elderly with subjective cognitive decline: a protocol for a network meta-analysis

**List of all authors**

Qian Liu<sup>1,#</sup>, Fang Wang<sup>1,#</sup>, Lixia Tan<sup>1</sup>, Li Liu<sup>1</sup>, Xiuying Hu<sup>1,\*</sup>

<sup>1</sup> Innovation Center of Nursing Research, Nursing Key Laboratory of Sichuan Province, West China Hospital, Sichuan University/West China School of Nursing, Sichuan University, China.

# These authors contributed equally to this work

\* Corresponding author: Xiuying Hu. Innovation Center of Nursing Research, Nursing Key Laboratory of Sichuan Province, West China Hospital, Sichuan University/West China School of Nursing, Sichuan University, PO Box No.37 Guo Xue Street, Chengdu, Sichuan 610041, PR China. Electronic address: [huxiuying@scu.edu.cn](mailto:huxiuying@scu.edu.cn).

**Authors' contributions**

Qian Liu designed this study with oversight by Xiuying Hu. Qian Liu drafted the protocol, and the draft was modified by Fang Wang and Li Liu. Qian Liu and Lixia Tan will search, select, and identify studies included, and extract data independently, while Li Liu will be the third reviewer for study selection and data extraction. Qian Liu will be responsible for methodology. All authors have approved the publication of this protocol.

1 Art therapies and cognitive function in elderly with subjective cognitive  
2 decline: a protocol for a network meta-analysis

3  
4 **Abstract**

5 Introduction: Subjective cognitive decline means a decline in the subjective  
6 perception of self-cognitive function, which is likely to evolve into mild cognitive  
7 impairment and dementia. The number of elderly with subjective cognitive decline  
8 has increased, bringing huge burdens and challenges to caregivers and society. With  
9 the increase in research on art therapies, some of them have gradually been proven to  
10 be effective for cognitive function. Therefore, this study aims to summarize the  
11 evidence and identify the best art therapy for elderly with subjective cognitive  
12 decline.

13 Methods and analysis: We will include published randomized controlled trials  
14 written in English and Chinese if the intervention is one of the art therapies and  
15 applied in people aged 60 and above with subjective cognitive decline. Eight  
16 electronic databases, including the Cochrane Central Register of Controlled Trials,  
17 PubMed, Web of Science, Elsevier, China BioMedical Literature Database, China  
18 National Knowledge Infrastructure, VIP Database, and Wanfang Database, will be  
19 searched from January 2013 to December 2023. Art therapies will mainly include  
20 music therapy, reminiscence therapy, painting therapy, dance therapy, reading therapy,  
21 horticultural therapy, museum therapy, calligraphy therapy, and so on. The outcome  
22 will be cognitive function. Study selection, data extraction and quality assessment will

1 be performed by two reviewers. The risk of bias will be evaluated according to the  
2 Cochrane Collaboration's risk of bias tool, and the evidence quality will be assessed  
3 with the Grading of Recommendations Assessment, Development and Evaluation.  
4 Standard pairwise meta-analysis and Bayesian network meta-analysis will be  
5 conducted. The probabilities of each art therapy will be ranked based on the surface  
6 under the cumulative ranking curve.

7 Ethics and dissemination: Ethical approval is not required for reviewing published  
8 studies. To provide important evidence for clinicians and guideline developers, the  
9 findings of this study will be submitted to a peer-reviewed journal.

10 PROSPERO registration number: CRD42023443773.

11 Key words: subjective cognitive decline; elderly; art therapy; protocol; network  
12 meta-analysis

### 14 **Strengths and limitations of this study**

15 1. This network meta-analysis will integrate direct evidence with indirect evidence  
16 and allow the comparison of multiple art therapies in one model.

17 2. Network meta-analysis will promote precision of intervention and provide  
18 evidence for the decisions of intervention and the development of guidelines.

19 3. On account of the retrospective nature of this study, the findings may be  
20 influenced by the quantity and quality of the included studies.



## 1 Introduction

2 As a global public health problem that urgently needs to be addressed, dementia  
3 leads to the loss of reasoning, memory, language, and ultimately basic self-care skills,  
4 which places an enormous burden on families and the health-care system. The  
5 development of dementia, such as Alzheimer's disease, is insidious, with onset of  
6 clinical symptoms preceded years earlier by perceived and/or objective cognitive  
7 decline [1], which is also the early stage of mild cognitive impairment [2]. Subjective  
8 cognitive decline refers to the decline in the subjective perception of self-cognitive  
9 function compared with the previous normal state, mainly memory decline, but  
10 objective neuropsychological tests are not abnormal, and this decline is not related to  
11 other acute events [3]. Previous studies have suggested that subjective cognitive  
12 decline is a preclinical symptom of mild cognitive impairment and dementia [4-7].  
13 The risk of developing dementia in the elderly with subjective cognitive decline was  
14 2.48 times higher than that in the elderly without cognitive abnormalities, and the risk  
15 of developing mild cognitive impairment was 1.83 times higher than that in the  
16 elderly without cognitive abnormalities [7]. Moreover, the findings of a long-term  
17 observational study over 10 years indicate that subjective cognitive decline can occur  
18 10 years before the diagnosis of Alzheimer's disease [8]. Therefore, the therapeutic  
19 window for addressing Alzheimer's disease can be moved forward, and subjective  
20 cognitive decline can be regarded as an important gateway for early prevention and  
21 treatment of Alzheimer's disease, which may help alleviate the major public health  
22 problem, although there are no approved treatments for Alzheimer's disease and even

1 mild cognitive impairment [9].

2 The efficacy of pharmacological interventions is limited. To avoid the side effects  
3 of antipsychotics, more attention is given to the application of nonpharmacological  
4 interventions [10]. Art therapy is an emerging nonpharmacological intervention with  
5 distinctive features that integrates psychology, art and medicine. Art therapy can take  
6 a variety of forms, such as music, singing, dancing, reading and poetry groups,  
7 museum/gallery art and collections, creative writing, life story narrative reminiscence,  
8 painting, printmaking, collage, pottery, sewing, knitting, woodwork and gardening  
9 [11]. As a kind of nonpharmacological intervention, art therapy has been widely  
10 proven to be beneficial in the care of patients with cognitive impairment and has been  
11 used in clinical practice in Europe and the United States [12]. It is helpful to reduce  
12 the mental and behavioral abnormalities of patients and slow down the progress of  
13 cognitive impairment, to achieve great effects in treatment and care. It is suggested  
14 that music listening can help to improve both subjective memory function and  
15 objective cognitive performance in adults with subjective cognitive decline [13].  
16 Several randomized controlled trials have demonstrated that dance therapy can  
17 improve cognitive function, especially episodic memory and processing speed [14-16].  
18 Moreover, painting therapy has been proven to improve cognitive function in patients  
19 with mild cognitive impairment [17]. A narrow review has summarized the positive  
20 effects of therapeutic gardens on the health, spanning physical, social, psychological  
21 and cognitive effects [18]. Additionally, spiritual reminiscence programs using  
22 expressive arts therapy are conducive to improving cognitive function [19].

1 With the increase in relevant research, art therapy has gradually been proven to be  
2 of great significance in alleviating cognitive decline. However, the advantages and  
3 disadvantages of the effects of different art therapies on elderly with subjective  
4 cognitive decline are still inconclusive at present, and studies directly comparing the  
5 differences in various art therapies are lacking. Network meta-analysis is capable of  
6 summarizing direct and indirect evidence, thus evaluating and comparing the relative  
7 efficacy of multiple treatments [20]. More importantly, network meta-analysis can  
8 provide the ranking of intervention options in accordance with their effectiveness.  
9 Therefore, this study will evaluate the effects of different art therapies on cognitive  
10 function in elderly (aged 60 and above) with subjective cognitive decline through a  
11 network meta-analysis, with the aim of identifying the most effective art therapy for  
12 this patient group. These findings may provide important evidence for care  
13 decision-making in elderly with subjective cognitive decline.

## 14 **Methods and analysis**

15 This network meta-analysis protocol was registered on the PROSPERO platform  
16 (CRD42023443773). The timeline of this work is planned between 28 June 2023 and  
17 31 May 2024. The results of this network meta-analysis will be reported following the  
18 Preferred Reporting Items for Systematic Review and Meta-Analysis Protocols [21].

### 19 **Eligibility criteria**

#### 20 Type of participants

21 Elderly diagnosed with subjective cognitive decline will be included. Inclusion  
22 criteria will be (1) diagnosed as subjective cognitive declined according to the criteria

1 published by the Subjective Cognitive Decline Initiative [22,23]; (2) aged 60 and  
2 above. The exclusion criteria will be (1) complicated with nervous system diseases  
3 which may cause subjective cognitive decline, such as dementia, Parkinson's disease,  
4 stroke, cephalomeningitis, and craniocerebral trauma; (2) complicated with major  
5 diseases that may affect subjective cognitive function, such as severe metabolic  
6 diseases and severe cardiopulmonary diseases; (3) complicated with severe mental  
7 illnesses, such as schizophrenia, bipolar disorder, severe depression, and severe  
8 anxiety.

#### 9 Type of studies

10 Only randomized controlled trials written in English or Chinese will be included.  
11 Cluster randomized controlled trials and cross-over randomized controlled trials will  
12 be excluded. Trials without a control group will be excluded. If the control group did  
13 not receive art therapy or usual care, the trial will also be excluded.

#### 14 Type of intervention

15 Any art therapy that is combined with usual care and implemented in elderly with  
16 subjective cognitive decline will be included. However, multi-component  
17 interventions that two or more art interventions or art therapies combined with other  
18 types of treatment (in addition to usual care) are applied in a experimental group will  
19 be excluded. These art therapies may be aimed at improving cognitive function. The  
20 types of art therapies for elderly with subjective cognitive decline may include (1)  
21 music therapy, (2) dance therapy, (3) reading therapy, (4) painting therapy, (5)  
22 horticultural therapy, (6) reminiscence therapy, (7) calligraphy therapy, and (8)

1  
2  
3  
4 1 museum therapy.

5  
6  
7 2 Comparison

8  
9 3 Comparator will be considered a usual care of subjective cognitive decline (such as  
10  
11  
12 4 guidance of drugs, diet, rehabilitation and complication prevention) or another art  
13  
14 5 therapy combined with usual care.

15  
16  
17 6 Type of outcomes

18  
19 7 The outcome will focus on cognitive function, which might be measured by a  
20  
21  
22 8 validated cognitive outcome measure, for example, subjective cognitive decline  
23  
24  
25 9 Questionnaire, the Mini-Mental State Examination, Montreal Cognitive Assessment,  
26  
27  
28 10 Addenbrooke's Cognitive Examination-III, Mini-Addenbrooke's Cognitive  
29  
30  
31 11 Examination, Memory Impairment Screen, Quick Screen for Mild Cognitive  
32  
33  
34 12 Impairment, Clock-Drawing Test, or Repeatable Battery for the Assessment of  
35  
36  
37 13 Neuropsychological Status. Subjective cognitive decline will be reported by using the  
38  
39  
40 14 original scores after intervention in the original study.

41 15 **Data sources and search strategy**

42  
43 16 The search used a combination of Medical Subject Headings and free words for  
44  
45  
46 17 professional searches. The search items will include subjective cognitive decline or  
47  
48  
49 18 SCD, art therapy (music\* or singing or danc\* or painting or drawing or collage or  
50  
51  
52 19 clay or theatre or drama or reading or poetry or woodwork or garden\* or horticultural  
53  
54  
55 20 or handwriting or penmanship or calligraphy or ceramics or pottery or writing or  
56  
57  
58 21 sculpture or carving or narrative or reminiscence or printmaking or sewing or knitting  
59  
60 22 or museum or gallery) and randomized controlled trial. Searches will be undertaken in

1 electronic databases to identify published studies, including the Cochrane Central  
2 Register of Controlled Trials, PubMed, Web of Science, Elsevier, China BioMedical  
3 Literature Database, China National Knowledge Infrastructure, VIP Database, and  
4 Wanfang Database. A draft search strategy is summarized in Supplementary Material  
5 1. The retrieval time will be from January 2013 to December 2023. In addition to the  
6 database search, the references of the included studies will be scanned to identify  
7 additional eligible studies.

### 8 **Study selection**

9 All investigators will receive appropriate training prior to study selection. All  
10 retrieved studies will be imported into NoteExpress software to download references.  
11 Duplicate studies will be removed. The titles and abstracts of selected studies will be  
12 screened independently by two reviewers to exclude studies that obviously do not  
13 meet the inclusion criteria. The preliminary results will be cross-checked. Then, the  
14 remaining full-text studies will be examined independently by the same two reviewers  
15 to determine eligibility. If there are disagreements, the third reviewer will be asked to  
16 evaluate the full text. Any discrepancies will be resolved through group discussions.  
17 We will record the excluded studies and reasons for exclusion. Figure 1 shows the  
18 process of study selection.

### 19 **Data extraction**

20 All researchers of this study will discuss and design a standard form for data  
21 extraction. Then, two reviewers will independently extract data in accordance with the  
22 standard form, including author (s), year of publication, sample size, characteristics of

1 patients (gender and age), intervention (type, frequency and duration), and  
2 measurements of outcome. After completing data extraction, the results of two  
3 reviewers will be crosschecked to ensure that there is no mistake. Team discussion  
4 will be used to resolve the disagreements.

### 5 **Risk of bias assessment**

6 The revised version of the Cochrane tool (RoB 2) will be used to assess the risk of  
7 bias for all included studies [24]. This tool will assess five domains, including (1) bias  
8 arising from the randomization process, (2) bias due to deviations from intended  
9 interventions, (3) bias due to missing outcome data, (4) bias in the measurement of the  
10 outcome and (5) bias in the selection of the reported result. The assessment of each  
11 domain will be rated as ‘low risk of bias’, ‘some concerns’ and ‘high risk of bias’.  
12 The response options for an overall risk-of-bias judgment are the same as those for  
13 individual domains. If all domains are rated as ‘low risk of bias’, this trial will be  
14 judged to be at low risk of bias. If at least one domain is rated as ‘some concerns’ and  
15 no domain is rated as ‘high risk of bias’, this trial will be judged to be ‘some  
16 concerns’. If at least one domain is rated as ‘high risk of bias’ or multiple domains are  
17 rated as ‘some concerns’ in a way that substantially lowers confidence in the result,  
18 this trial will be judged to be at high risk of bias. Two reviewers will independently  
19 evaluate the risk of bias for each study and then cross-check the results. Differences  
20 will be resolved through team discussion with the third reviewer.

### 21 **Statistical analysis**

22 Pairwise meta-analysis

1 We will use Review Manager (version 5.3) to conduct a pairwise meta-analysis of  
2 direct evidence. For continuous outcomes, standardized mean differences with 95%  
3 confidence intervals will be used. The  $\chi^2$  test will be used to assess the heterogeneity  
4 across all included trials. A fixed-effects model will be used to synthesize the  
5 standardized mean difference if the p value is  $\geq 0.1$ . Conversely, if the p value is  $< 0.1$ ,  
6 a random-effects model will be used.

#### 7 Network meta-analysis

8 Considering the expected heterogeneity between studies, the effects of different art  
9 therapies will be compared by conducting a random-effects network meta-analysis  
10 within a Bayesian framework using Markov Chains Monte Carlo in R software  
11 (version 4.1.3). Brooks-Gelman-Rubin diagnosis and potential scale reduction factor  
12 will be used to ensure the convergence of the model [25]. Moreover, the surface under  
13 the cumulative ranking curve with its 95% confidence interval and rank-heat plot will  
14 be used to evaluate the hierarchy of each art therapy [26,27].

#### 15 Dealing with missing data

16 If there is a lack of some information, the missing data will be obtained by  
17 contacting the corresponding authors whenever possible. We will try to calculate the  
18 missing data based on availability factors if there is no reply. Sensitivity analysis will  
19 be used to examine the potential impact of missing data on the results of this study.

#### 20 Assessment of publication bias

21 If more than nine studies are included in the analysis, funnel plots, Begg's rank  
22 correction and Egger's regression tests will be used to evaluate the presence of



1 publication bias in Stata software (version 15.0) [28-30].

2 Assessment of inconsistency and subgroup analysis

3 Based on a loop-special method within each loop of the network [31], the local  
4 inconsistency and global inconsistency will be measured in Stata software (version  
5 15.0) [32].<sup>[32]</sup> If there is heterogeneity or inconsistency, the sources of heterogeneity  
6 will be explored by network meta-regression. Subgroup analysis will be performed in  
7 accordance with age, gender, or duration of intervention.

8 Sensitivity analysis

9 We will perform a sensitivity analysis for primary outcomes to verify the  
10 robustness of the findings. In the sensitivity analysis, trials judged to be at high risk of  
11 bias, trials with missing data and trials with the smallest sample size will be excluded.  
12 Then, to examine whether the results change and whether the transitivity (consistency  
13 and model fit) is affected, the same methods used to conduct the network  
14 meta-analysis will be repeated.

15 Quality of evidence

16 We will also evaluate the quality of evidence conducting to primary outcomes based  
17 on the Grading of Recommendations Assessment, Development and Evaluation  
18 framework, in accordance with limitations of study, imprecision, heterogeneity,  
19 inconsistency, indirectness and publication bias [33].

20 **Patient and Public Involvement**

21 This study is based on published data, so patients or the public were not involved in  
22 the design, conduct, reporting, and dissemination plans of our research.

## 1 Discussion

2 According to a cohort study, the prevalence of subjective cognitive decline is  
3 currently slightly high, ranging from 7.8% to 52.7% which is based on estimated  
4 based on age and gender standardization in the population [34]. This means that  
5 subjective cognitive decline is gradually becoming a health issue in elderly who  
6 requires special attention. Subjective cognitive decline is an important risk factor for  
7 mild cognitive impairment and Alzheimer's disease [6], which may cause adverse  
8 effects on the quality of life of elderly and bring enormous burdens to caregivers and  
9 society, and obstruct the realization of healthy aging and active aging. The effects of  
10 pharmacological intervention are limited to some extent. Nonpharmacological  
11 interventions have become the preferred approach to treat and care for patients with  
12 cognitive impairment because of their simplicity, easy operation and high safety [35].

13 At present, art therapies such as music therapy, dance therapy, painting therapy,  
14 reading therapy, horticultural therapy, reminiscence therapy, calligraphy therapy and  
15 museum therapy have been applied to improve cognitive function in patients with  
16 subjective cognitive decline. Music, as an artistic manifestation, offers a profound  
17 impact on the emotional, cognitive, and physiological aspects of personal experiences  
18 [36]. Some studies have shown that music therapy has a positive impact on  
19 individuals with decreased cognitive function, helping improve objective and  
20 subjective cognitive functions, such as subjective memory function [37].  
21 Reminiscence therapy is also one of the common methods used to improve cognitive  
22 function in the elderly, which helps stimulate autobiographical memory and

1 simultaneously improve mental health [38]. Horticultural therapy can promote active  
2 contact and interaction between human and natural elements, thereby improving the  
3 cognitive function and mental health of the elderly [39]. In addition, some scholars  
4 believe that horticultural therapy may improve cognition function through metabolic  
5 biomarkers such as tryptophan, kynurenine, and serotonin [40]. From the current  
6 research results, it can be seen that various art therapies have a positive effect on  
7 improving cognitive function through different means. However, to date, no network  
8 meta-analysis has been performed to evaluate the comparative efficacy of all available  
9 art therapies. Consequently, it is necessary to conduct a network meta-analysis to  
10 identify the effects of art therapies. To the best of our knowledge, this is the first  
11 network meta-analysis to analyze the effects of art therapies in elderly with subjective  
12 cognitive decline. Based on the comparative effectiveness evidence, this network  
13 meta-analysis is expected to find the best art therapy for improving cognitive function  
14 in elderly with subjective cognitive decline. The results could help patients and  
15 clinicians choose the best intervention. In addition, we hope that the results of this  
16 study could provide evidence for the recommendations of guidelines.

### 17 **Ethics and dissemination**

18 This study is based on published data, so ethical approval is not a requirement. We  
19 plan to publish the findings of this study in a peer-reviewed journal. This work is now  
20 in progress, and preparations has start on 28 June 2023. We are searching the relevant  
21 studies. The expected end time is 31 May 2024. The results will be reported based on  
22 the PRISMA-compliant guidelines.

## 1 **Authors' contributions**

2 Qian Liu designed this study with oversight by Xiuying Hu. Qian Liu drafted the  
3 protocol, and the draft was modified by Fang Wang and Li Liu. Qian Liu and Lixia  
4 Tan will search, select, and identify studies, and extract data independently, while Li  
5 Liu will be the third reviewer for study selection and data extraction. Qian Liu will be  
6 responsible for the methodology. All authors have approved the publication of this  
7 protocol.

## 8 **Funding statement**

9 This study is funded by a project from the West China Hospital of Sichuan  
10 University and University of Electronic Science and Technology of China (Grant No.  
11 HXDZ21003) and the Institutional Research Fund from Sichuan University  
12 (2022SCUH0030).

## 13 **Competing interests statement**

14 The authors have no conflicts of interest to disclose.

## 16 **References**

- 17 [1] Alzheimer's Association. 2015 Alzheimer's disease facts and figures. *Alzheimers*  
18 *Dement* 2015;11(3):332-84.
- 19 [2] Jack CR Jr, Bennett DA, Blennow K, *et al.* NIA-AA Research Framework:  
20 Toward a biological definition of Alzheimer's disease. *Alzheimers Dement* 2018;  
21 14(4):535-562.
- 22 [3] Jessen F, Amariglio RE, van Boxtel M, *et al.* A conceptual framework for research  
23 on subjective cognitive decline in preclinical Alzheimer's disease. *Alzheimers Dement*  
24 2014;10(6):844-52.
- 25 [4] Lin Y, Shan PY, Jiang WJ, *et al.* Subjective cognitive decline: preclinical  
26 manifestation of Alzheimer's disease. *Neurol Sci* 2019;40(1):41-49.
- 27 [5] Slot RER, Sikkes SAM, Berkhof J, *et al.* Subjective cognitive decline and rates of  
28 incident Alzheimer's disease and non-Alzheimer's disease dementia. *Alzheimers*  
29 *Dement* 2019;15(3):465-476.

- 1  
2  
3  
4  
5  
6  
7  
8  
9  
10  
11  
12  
13  
14  
15  
16  
17  
18  
19  
20  
21  
22  
23  
24  
25  
26  
27  
28  
29  
30  
31  
32  
33  
34  
35  
36  
37  
38  
39  
40  
41  
42  
43  
44  
45  
46  
47  
48  
49  
50  
51  
52  
53  
54  
55  
56  
57  
58  
59  
60
- [6] Colijn MA, Grossberg GT. Amyloid and Tau Biomarkers in Subjective Cognitive Impairment. *J Alzheimers Dis* 2015;47(1):1-8.
- [7] Pike KE, Cavuoto MG, Li L, *et al.* Subjective Cognitive Decline: Level of Risk for Future Dementia and Mild Cognitive Impairment, a Meta-Analysis of Longitudinal Studies. *Neuropsychol Rev* 2022;32(4):703-735.
- [8] Verlinden VJA, van der Geest JN, de Bruijn RFAG, *et al.* Trajectories of decline in cognition and daily functioning in preclinical dementia. *Alzheimers Dement* 2016;12(2):144-153.
- [9] Sperling RA, Jack CR Jr, Aisen PS. Testing the right target and right drug at the right stage. *Sci Transl Med* 2011;3(111):111cm33.
- [10] Abraha I, Rimland JM, Trotta FM, *et al.* Systematic review of systematic reviews of non-pharmacological interventions to treat behavioural disturbances in older patients with dementia. The SENATOR-OnTop series. *BMJ Open* 2017; 7 (3): e012759.
- [11] Roe B. Arts for health initiatives: an emerging international agenda and evidence base for older populations. *J Adv Nurs* 2014; 70 (1): 1-3.
- [12] Camic PM, Zeilig H, Crutch SJ. The arts and dementia: Emerging directions for theory, research and practice. *Dementia (London)* 2018; 17 (6): 641-644.
- [13] Innes KE, Selfe TK, Khalsa DS, *et al.* Meditation and Music Improve Memory and Cognitive Function in Adults with Subjective Cognitive Decline: A Pilot Randomized Controlled Trial. *J Alzheimers Dis* 2017;56(3):899-916.
- [14] Zhu Y, Wu H, Qi M, *et al.* Effects of a specially designed aerobic dance routine on mild cognitive impairment. *Clin Interv Aging* 2018; 13: 1691-1700.
- [15] Doi T, Verghese J, Makizako H, *et al.* Effects of Cognitive Leisure Activity on Cognition in Mild Cognitive Impairment: Results of a Randomized Controlled Trial. *J Am Med Dir Assoc* 2017; 18 (8): 686-691.
- [16] Borges EGDS, Vale RGS, Pernambuco CS, *et al.* Effects of dance on the postural balance, cognition and functional autonomy of older adults. *Rev Bras Enferm* 2018; 71 (suppl 5): 2302-2309.
- [17] Zhao J, Li H, Lin R, *et al.* Effects of creative expression therapy for older adults with mild cognitive impairment at risk of Alzheimer's disease: a randomized controlled clinical trial. *Clin Interv Aging* 2018; 13: 1313-1320.
- [18] Uwajeh PC, Iyendo TO, Polay M. Therapeutic gardens as a design approach for optimising the healing environment of patients with Alzheimer's disease and other dementias: A narrative review. *Explore (NY)* 2019; 15 (5): 352-362.
- [19] Ho YV. A pilot study of spiritual reminiscence programme using expressive arts therapy for the older adults with mild cognitive impairment staying in nursing home. *Hong Kong: The University of Hong Kong*, 2017.
- [20] Li J, Zhong D, Ye J, *et al.* Rehabilitation for balance impairment in patients after stroke: a protocol of a systematic review and network meta-analysis. *BMJ Open* 2019; 9 (7): e026844.
- [21] Shamseer L, Moher D, Clarke M, *et al.* Preferred reporting items for systematic review and meta-analysis protocols (PRISMA-P) 2015: elaboration and explanation. *BMJ* 2015; 350: g7647.

- 1  
2  
3  
4  
5  
6  
7  
8  
9  
10  
11  
12  
13  
14  
15  
16  
17  
18  
19  
20  
21  
22  
23  
24  
25  
26  
27  
28  
29  
30  
31  
32  
33  
34  
35  
36  
37  
38  
39  
40  
41  
42  
43  
44  
45  
46  
47  
48  
49  
50  
51  
52  
53  
54  
55  
56  
57  
58  
59  
60
- [22]Molinuevo JL, Rabin LA, Amariglio R, *et al.* Implementation of subjective cognitive decline criteria in research studies. *Alzheimers Dement* 2017;13(3):296-311.
- [23]Song YH, Liu YS, Yang Q, *et al.* Correlation of Subjective Cognitive Decline with Multimorbidity among Elderly People. *Chinese General Practice* 2023; 26(10):1241-1249. (in Chinese)
- [24]Sterne JAC, Savović J, Page MJ, *et al.* RoB 2: a revised tool for assessing risk of bias in randomised trials. *BMJ* 2019, 366:14898.
- [25]Brooks SP, Gelman A. Alternative methods for monitoring convergence of iterative simulations. *J Comput Graph Stat* 1998; 7: 434-45.
- [26]Salanti G, Ades AE, Ioannidis JP. Graphical methods and numerical summaries for presenting results from multiple-treatment meta-analysis: an overview and tutorial. *J Clin Epidemiol* 2011; 64 (2): 163-71.
- [27]Veroniki AA, Straus SE, Fyraridis A, *et al.* The rank-heat plot is a novel way to present the results from a network meta-analysis including multiple outcomes. *J Clin Epidemiol* 2016; 76: 193-9.
- [28]Collaboration TC. Cochrane Handbook for systematic reviews of interventions version 5.1.0, 2011.
- [29]Begg CB, Mazumdar M. Operating characteristics of a RANK correlation test for publication bias. *Biometrics* 1994; 50: 1088-1101.
- [30]Egger M, Smith GD, Schneider M, *et al.* Bias in meta-analysis detected by a simple, graphical test. *BMJ* 1997; 315: 629-34.
- [31]Du Y, Wu F, Lu S, *et al.* Efficacy of pressure ulcer prevention interventions in adult intensive care units: a protocol for a systematic review and network meta-analysis. *BMJ Open* 2019; 9 (4): e026727.
- [32]Higgins JP, Jackson D, Barrett JK, *et al.* Consistency and inconsistency in network meta-analysis: concepts and models for multi-arm studies. *Res Synth Methods* 2012; 3 (2): 98-110.
- [33]Puhan MA, Schünemann HJ, Murad MH, *et al.* A GRADE Working Group approach for rating the quality of treatment effect estimates from network meta-analysis. *BMJ* 2014; 349: g5630.
- [34]Röhr S, Pabst A, Riedel-Heller SG, *et al.* Estimating prevalence of subjective cognitive decline in and across international cohort studies of aging: a COSMIC study. *Alzheimers Res Ther* 2020;12(1):167.
- [35]Calsolaro V, Antognoli R, Okoye C, *et al.* The Use of Antipsychotic Drugs for Treating Behavioral Symptoms in Alzheimer's Disease. *Front Pharmacol* 2019;10: 1465.
- [36]Gómez-Carballa A, Navarro L, Pardo-Seco J, *et al.* Music compensates for altered gene expression in age-related cognitive disorders. *Sci Rep* 2023;13(1):21259.
- [37]Kim J, Cuevas H, Wood ST. Effect of Music Interventions on Cognitive Function in Older Adults With Mild Cognitive Impairment: A Systematic Review. *Res Gerontol Nurs* 2023;16(5):259-268.
- [38]Villasán-Rueda A, Sánchez-Cabaco A, Mejía-Ramírez M, *et al.* Transcultural Pilot Study of the Efficacy of Reminiscence Therapy for Mexican and Spanish Older Adults with Different Levels of Cognitive Decline. *J Cross Cult Gerontol*

1  
2  
3  
4  
5  
6  
7  
8  
9  
10  
11  
12  
13  
14  
15  
16  
17  
18  
19  
20  
21  
22  
23  
24  
25  
26  
27  
28  
29  
30  
31  
32  
33  
34  
35  
36  
37  
38  
39  
40  
41  
42  
43  
44  
45  
46  
47  
48  
49  
50  
51  
52  
53  
54  
55  
56  
57  
58  
59  
60

1 2023;38(4):371-388.

2 [39]Wang M, Wu J, Yan H. The effect of horticultural therapy on older adults in  
3 pension institutions: a systematic review. *Geriatr Nurs* 2023;51:25-32.

4 [40]Park SA, Son SY, Lee AY, *et al.* Metabolite Profiling Revealed That a Gardening  
5 Activity Program Improves Cognitive Ability Correlated with BDNF Levels and  
6 Serotonin Metabolism in the Elderly. *Int J Environ Res Public Health*.  
7 2020;17(2):541.

8  
9  
10  
11  
12  
13  
14  
15  
16  
17  
18  
19  
20  
21  
22  
23  
24  
25  
26  
27  
28  
29  
30  
31  
32  
33  
34  
35  
36  
37  
38  
39  
40  
41  
42  
43  
44  
45  
46  
47  
48  
49  
50  
51  
52  
53  
54  
55  
56  
57  
58  
59  
60

For peer review only

1  
2  
3  
4  
5  
6  
7  
8  
9  
10  
11  
12  
13  
14  
15  
16  
17  
18  
19  
20  
21  
22  
23  
24  
25  
26  
27  
28  
29  
30  
31  
32  
33  
34  
35  
36  
37  
38  
39  
40  
41  
42  
43  
44  
45  
46  
47  
48  
49  
50  
51  
52  
53  
54  
55  
56  
57  
58  
59  
60

1  
2  
3  
4

**Figure legend**

Figure 1. Study flow diagram

For peer review only





Fig. 1 The processes of study selection

## Supplementary Material 1: Search strategy

### 1. Cochrane Central Register of Controlled Trials

(subjective cognitive decline OR SCD) AND (art therapy OR music\* OR singing OR danc\* OR painting OR drawing OR collage OR clay OR theatre OR drama OR reading OR poetry OR woodwork OR garden\* OR horticultural OR handwriting OR penmanship OR calligraphy OR ceramics OR pottery OR writing OR sculpture OR carving OR narrative OR reminiscence OR printmaking OR sewing OR knitting OR museum OR gallery) AND (randomized controlled trial OR RCT).

### 2. PubMed

("subjective cognitive decline" OR "SCD") AND ("art therapy" OR "music\*" OR "singing" OR "danc\*" OR "painting" OR "drawing" OR "collage" OR "clay" OR "theatre" OR "drama" OR "reading" OR "poetry" OR "woodwork" OR "garden\*" OR "horticultural" OR "handwriting" OR "penmanship" OR "calligraphy" OR "ceramics" OR "pottery" OR "writing" OR "sculpture" OR "carving" OR "narrative" OR "reminiscence" OR "printmaking" OR "sewing" OR "knitting" OR "museum" OR "gallery") AND ("randomized controlled trial" OR "RCT").

### 3. Web of Science

(TS =subjective cognitive decline OR TS =SCD) AND (TS =art therapy OR TS =music\* OR TS =singing OR TS =danc\* OR TS =painting OR TS =drawing OR TS =collage OR TS =clay OR TS =theatre OR TS =drama OR TS =reading OR TS =poetry OR TS =woodwork OR TS =garden\* OR TS =horticultural OR TS =handwriting OR TS =penmanship OR TS =calligraphy OR TS =ceramics OR TS =pottery OR TS =writing OR TS =sculpture OR TS =carving OR TS =narrative OR TS =reminiscence OR TS =printmaking OR TS =sewing OR TS =knitting OR TS =museum OR TS =gallery) AND (TS =randomized controlled trial OR TS =RCT).

### 4. Elsevier

(subjective cognitive decline OR SCD) AND (art therapy OR music\* OR singing OR danc\* OR painting OR drawing OR collage OR clay OR theatre OR drama OR reading OR poetry OR woodwork OR garden\* OR horticultural OR handwriting OR penmanship OR calligraphy OR ceramics OR pottery OR writing OR sculpture OR carving OR narrative OR reminiscence OR printmaking OR sewing OR knitting OR museum OR gallery) AND (randomized controlled trial OR RCT).

### **5. China BioMedical Literature Database**

(“主观认知能力下降” OR “主观认知下降”) AND (“音乐” OR “舞蹈” OR “绘画” OR “拼贴” OR “黏土” OR “戏剧” OR “诗歌” OR “阅读” OR “园艺” OR “书法” OR “陶艺” OR “写作” OR “雕塑” OR “叙事” OR “回忆” OR “缅怀” OR “版画” OR “缝纫” OR “针织” OR “博物馆” OR “画廊”) AND (“随机对照试验”)

### **6. China National Knowledge Infrastructure**

(SU=主观认知能力下降 OR SU=主观认知下降) AND (SU=音乐 OR SU=舞蹈 OR SU=绘画 OR SU=拼贴 OR SU=黏土 OR SU=戏剧 OR SU=诗歌 OR SU=阅读 OR SU=园艺 OR SU=书法 OR SU=陶艺 OR SU=写作 OR SU=雕塑 OR SU=叙事 OR SU=回忆 OR SU=缅怀 OR SU=版画 OR SU=缝纫 OR SU=针织 OR SU=博物馆 OR SU=画廊) AND (SU=随机对照试验)

### **7. VIP Database**

(“主观认知能力下降” OR “主观认知下降”) AND (“音乐” OR “舞蹈” OR “绘画” OR “拼贴” OR “黏土” OR “戏剧” OR “诗歌” OR “阅读” OR “园艺” OR “书法” OR “陶艺” OR “写作” OR “雕塑” OR “叙事” OR “回忆” OR “缅怀” OR “版画” OR “缝纫” OR “针织” OR “博物馆” OR “画廊”) AND (“随机对照试验”)

### **8. Wanfang Database**

(“主观认知能力下降” OR “主观认知下降”) AND (“音乐” OR “舞蹈” OR “绘画” OR “拼贴” OR “黏土” OR “戏剧” OR “诗歌” OR “阅读” OR “园艺” OR “书法”

1  
2  
3  
4  
5  
6  
7  
8  
9  
10  
11  
12  
13  
14  
15  
16  
17  
18  
19  
20  
21  
22  
23  
24  
25  
26  
27  
28  
29  
30  
31  
32  
33  
34  
35  
36  
37  
38  
39  
40  
41  
42  
43  
44  
45  
46  
47  
48  
49  
50  
51  
52  
53  
54  
55  
56  
57  
58  
59  
60

OR “陶艺 OR “写作” OR “雕塑” OR “叙事” OR “回忆” OR “缅怀”OR “版画” OR  
“缝纫” OR “针织” OR “博物馆” OR “画廊” ) AND (“随机对照试验”)

For peer review only

**PRISMA-P (Preferred Reporting Items for Systematic review and Meta-Analysis Protocols) 2015 checklist: recommended items to address in a systematic review protocol\***

| Section and topic                 | Item No | Checklist item                                                                                                                                                                                                                | Page  |
|-----------------------------------|---------|-------------------------------------------------------------------------------------------------------------------------------------------------------------------------------------------------------------------------------|-------|
| <b>ADMINISTRATIVE INFORMATION</b> |         |                                                                                                                                                                                                                               |       |
| Title:                            |         |                                                                                                                                                                                                                               |       |
| Identification                    | 1a      | Identify the report as a protocol of a systematic review                                                                                                                                                                      | 1     |
| Update                            | 1b      | If the protocol is for an update of a previous systematic review, identify as such                                                                                                                                            | NA    |
| Registration                      | 2       | If registered, provide the name of the registry (such as PROSPERO) and registration number                                                                                                                                    | 2     |
| Authors:                          |         |                                                                                                                                                                                                                               |       |
| Contact                           | 3a      | Provide name, institutional affiliation, e-mail address of all protocol authors; provide physical mailing address of corresponding author                                                                                     | 1     |
| Contributions                     | 3b      | Describe contributions of protocol authors and identify the guarantor of the review                                                                                                                                           | 13-14 |
| Amendments                        | 4       | If the protocol represents an amendment of a previously completed or published protocol, identify as such and list changes; otherwise, state plan for documenting important protocol amendments                               | NA    |
| Support:                          |         |                                                                                                                                                                                                                               |       |
| Sources                           | 5a      | Indicate sources of financial or other support for the review                                                                                                                                                                 | 14    |
| Sponsor                           | 5b      | Provide name for the review funder and/or sponsor                                                                                                                                                                             | 14    |
| Role of sponsor or funder         | 5c      | Describe roles of funder(s), sponsor(s), and/or institution(s), if any, in developing the protocol                                                                                                                            | 14    |
| <b>INTRODUCTION</b>               |         |                                                                                                                                                                                                                               |       |
| Rationale                         | 6       | Describe the rationale for the review in the context of what is already known                                                                                                                                                 | 3-5   |
| Objectives                        | 7       | Provide an explicit statement of the question(s) the review will address with reference to participants, interventions, comparators, and outcomes (PICO)                                                                      | 3-5   |
| <b>METHODS</b>                    |         |                                                                                                                                                                                                                               |       |
| Eligibility criteria              | 8       | Specify the study characteristics (such as PICO, study design, setting, time frame) and report characteristics (such as years considered, language, publication status) to be used as criteria for eligibility for the review | 6-7   |
| Information sources               | 9       | Describe all intended information sources (such as electronic databases, contact with study authors, trial registers or other grey literature sources) with planned dates of coverage                                         | 8     |
| Search strategy                   | 10      | Present draft of search strategy to be used for at least one electronic database, including planned limits, such that it could be repeated                                                                                    | 8     |
| Study records:                    |         |                                                                                                                                                                                                                               |       |
| Data management                   | 11a     | Describe the mechanism(s) that will be used to manage records and data throughout the review                                                                                                                                  | 8     |

|                                    |     |                                                                                                                                                                                                                                                  |      |
|------------------------------------|-----|--------------------------------------------------------------------------------------------------------------------------------------------------------------------------------------------------------------------------------------------------|------|
| Selection process                  | 11b | State the process that will be used for selecting studies (such as two independent reviewers) through each phase of the review (that is, screening, eligibility and inclusion in meta-analysis)                                                  | 8    |
| Data collection process            | 11c | Describe planned method of extracting data from reports (such as piloting forms, done independently, in duplicate), any processes for obtaining and confirming data from investigators                                                           | 8-9  |
| Data items                         | 12  | List and define all variables for which data will be sought (such as PICO items, funding sources), any pre-planned data assumptions and simplifications                                                                                          | 9    |
| Outcomes and prioritization        | 13  | List and define all outcomes for which data will be sought, including prioritization of main and additional outcomes, with rationale                                                                                                             | 7    |
| Risk of bias in individual studies | 14  | Describe anticipated methods for assessing risk of bias of individual studies, including whether this will be done at the outcome or study level, or both; state how this information will be used in data synthesis                             | 9-10 |
| Data synthesis                     | 15a | Describe criteria under which study data will be quantitatively synthesised                                                                                                                                                                      | 10   |
|                                    | 15b | If data are appropriate for quantitative synthesis, describe planned summary measures, methods of handling data and methods of combining data from studies, including any planned exploration of consistency (such as $I^2$ , Kendall's $\tau$ ) | 10   |
|                                    | 15c | Describe any proposed additional analyses (such as sensitivity or subgroup analyses, meta-regression)                                                                                                                                            | 11   |
|                                    | 15d | If quantitative synthesis is not appropriate, describe the type of summary planned                                                                                                                                                               | NA   |
| Meta-bias(es)                      | 16  | Specify any planned assessment of meta-bias(es) (such as publication bias across studies, selective reporting within studies)                                                                                                                    | 11   |
| Confidence in cumulative evidence  | 17  | Describe how the strength of the body of evidence will be assessed (such as GRADE)                                                                                                                                                               | 12   |

**\* It is strongly recommended that this checklist be read in conjunction with the PRISMA-P Explanation and Elaboration (cite when available) for important clarification on the items. Amendments to a review protocol should be tracked and dated. The copyright for PRISMA-P (including checklist) is held by the PRISMA-P Group and is distributed under a Creative Commons Attribution Licence 4.0.**

*From: Shamseer L, Moher D, Clarke M, Ghersi D, Liberati A, Petticrew M, Shekelle P, Stewart L, PRISMA-P Group. Preferred reporting items for systematic review and meta-analysis protocols (PRISMA-P) 2015: elaboration and explanation. BMJ. 2015 Jan 2;349(jan02 1):g7647.*
